# Supplementary material for: The role of NMR-based circulating metabolic biomarkers in development and risk prediction of new onset type 2 diabetes
Source: PubMed Central journal article supplement (PMC9445062; doi:10.1038/s41598-022-19159-8), 2022-09-05

*This page is intentionally left blank*

# **The role of NMR-based circulating metabolic biomarkers in development and risk prediction of new onset type 2 diabetes**

## **Supplementary Materials, Table of Contents**

Page 3. China Kadoorie Biobank collaborative group and members

Page 4. Supplementary Table S1. Associations of metabolic biomarkers with risk of incident type 2 diabetes

Page 8. Supplementary Table S2. Chinese population type 2 diabetes risk prediction models

Page 9. Supplementary Figure S1. Correlation between directly-measured metabolic biomarkers within subcohort participants (n=789)

Page 10. Supplementary Figure S2. Associations of directly-measured metabolic biomarkers with incident type 2 diabetes

Page 11. Supplementary Figure S3. Associations of metabolic biomarkers with incident type 2 diabetes

Page 13. Supplementary Figure S4. Associations of lipids, apolipoproteins and lipoprotein particle concentrations with risk of incident type 2 diabetes, stratified by adiposity

Page 14. Supplementary Figure S5. Associations of fatty acids, amino acids, glycolysis metabolites, ketone bodies and inflammatory markers with risk of incident type 2 diabetes, stratified by adiposity

Page 15. Supplementary Figure S6. Associations of lipids, apolipoproteins and lipoprotein particle concentrations with risk of incident type 2 diabetes, stratified by age

Page 16. Supplementary Figure S7. Associations of fatty acids, amino acids, glycolysis metabolites, ketone bodies and inflammatory markers with risk of incident type 2 diabetes, stratified by age

Page 17. Supplementary Figure S8. Associations of lipids, apolipoproteins and lipoprotein particle concentrations with risk of incident type 2 diabetes, stratified by sex

Page 18. Supplementary Figure S9. Associations of fatty acids, amino acids, glycolysis metabolites, ketone bodies and inflammatory markers with risk of incident type 2 diabetes, stratified by sex

Page 19. Supplementary Figure S10. Associations of lipids, apolipoproteins and lipoprotein particle concentrations with risk of incident type 2 diabetes, stratified by region

Page 20. Supplementary Figure S11. Associations of fatty acids, amino acids, glycolysis metabolites, ketone bodies and inflammatory markers with risk of incident type 2 diabetes, stratified by region

Page 21. Supplementary Figure S12. Associations of metabolic biomarkers with risk of incident type 2 diabetes (n=757) excluding the first 2 years of follow-up

## China Kadoorie Biobank collaborative group and members

**International Steering Committee:** Junshi Chen, Zhengming Chen (PI), Robert Clarke, Rory Collins, Yu Guo, Liming Li (PI), Chen Wang, Jun Lv, Richard Peto, Robin Walters

**International Co-ordinating Centre, Oxford:** Daniel Avery, Fiona Bragg, Derrick Bennett, Ruth Boxall, Ka Hung Chan, Yumei Chang, Yiping Chen, Zhengming Chen, Johnathan Clarke; Robert Clarke, Huaidong Du, Zammy Fairhurst-Hunter, Hannah Fry, Wei Gan, Simon Gilbert, Alex Hacker, Parisa Hariri, Mike Hill, Michael Holmes, Pek Kei Im, Andri Iona, Maria Kakkoura, Christiana Kartsonaki, Rene Kerosi, Kuang Lin, Mohsen Mazidi, Iona Millwood, Qunhua Nie, Alfred Pozarickij, Paul Ryder, Sam Sansome, Dan Schmidt, Paul Sherliker, Rajani Sohoni, Becky Stevens, Iain Turnbull, Robin Walters, Lin Wang, Neil Wright, Ling Yang, Xiaoming Yang, Pang Yao

**National Co-ordinating Centre, Beijing:** Yu Guo, Xiao Han, Can Hou, Chun Li, Chao Liu, Jun Lv, Pei Pei, Canqing Yu

### 10 Regional Co-ordinating Centres:

**Guangxi** Provincial CDC: Naying Chen, Duo Liu, Zhenzhu Tang. **Liuzhou** CDC: Ningyu Chen, Qilian Jiang, Jian Lan, Mingqiang Li, Yun Liu, Fanwen Meng, Jinhuai Meng, Rong Pan, Yulu Qin, Ping Wang, Sisi Wang, Liuping Wei, Liyuan Zhou. **Gansu** Provincial CDC: Caixia Dong, Pengfei Ge, Xiaolan Ren. **Maiji** CDC: Zhongxiao Li, Enke Mao, Tao Wang, Hui Zhang, Xi Zhang. **Hainan** Provincial CDC: Jinyan Chen, Ximin Hu, Xiaohuan Wang. **Meilan** CDC: Zhendong Guo, Huimei Li, Yilei Li, Min Weng, Shukuan Wu. **Heilongjiang** Provincial CDC: Shichun Yan, Mingyuan Zou, Xue Zhou. **Nangang** CDC: Ziyang Guo, Quan Kang, Yanjie Li, Bo Yu, Qinai Xu. **Henan** Provincial CDC: Liang Chang, Lei Fan, Shixian Feng, Ding Zhang, Gang Zhou. **Huixian** CDC: Yulian Gao, Tianyou He, Pan He, Chen Hu, Huarong Sun, Xukui Zhang. **Hunan** Provincial CDC: Biyun Chen, Zhongxi Fu, Yuelong Huang, Huilin Liu, Qiaohua Xu, Li Yin. **Liuyang** CDC: Huajun Long, Xin Xu, Hao Zhang, Libo Zhang. **Jiangsu** Provincial CDC: Jian Su, Ran Tao, Ming Wu, Jie Yang, Jinyi Zhou, Yonglin Zhou. **Suzhou** CDC: Yihe Hu, Yujie Hua, Jianrong Jin Fang Liu, Jingchao Liu, Yan Lu, Liangcai Ma, Aiyu Tang, Jun Zhang. **Qingdao** Qingdao CDC: Liang Cheng, Ranran Du, Ruqin Gao, Feifei Li, Shanpeng Li, Yongmei Liu, Feng Ning, Zengchang Pang, Xiaohui Sun, Xiaocao Tian, Shaojie Wang, Yaoming Zhai, Hua Zhang, Licang CDC: Wei Hou, Silu Lv, Junzheng Wang. **Sichuan** Provincial CDC: Xiaofang Chen, Xianping Wu, Ningmei Zhang, Weiwei Zhou. **Pengzhou** CDC: Xiaofang Chen, Jianguo Li, Jiaqiu Liu, Guojin Luo, Qiang Sun, Xunfu Zhong. **Zhejiang** Provincial CDC: Weiwei Gong, Ruying Hu, Hao Wang, Meng Wan, Min Yu. **Tongxiang** CDC: Lingli Chen, Qijun Gu, Dongxia Pan, Chunmei Wang, Kaixu Xie, Xiaoyi Zhang

**Supplementary Table S1. Associations of metabolic biomarkers with risk of incident type 2 diabetes**

| Metabolic biomarker                             | Mean (SD)                                             | Model A           |                        | Model B           |                        | Model C1          |                        | Model C2          |                        | Model C3          |                        | Model D           |                        |
|-------------------------------------------------|-------------------------------------------------------|-------------------|------------------------|-------------------|------------------------|-------------------|------------------------|-------------------|------------------------|-------------------|------------------------|-------------------|------------------------|
|                                                 |                                                       | HR* (95% CI)      | p-value†               | HR* (95% CI)      | p-value†               | HR* (95% CI)      | p-value†               | HR* (95% CI)      | p-value†               | HR* (95% CI)      | p-value†               | HR* (95% CI)      | p-value†               |
| 18:2, linoleic acid                             | 2.70 (0.56) mmol/L                                    | 1.88 (1.60, 2.21) | 5.50×10 <sup>-14</sup> | 1.87 (1.58, 2.21) | 4.38×10 <sup>-13</sup> | 1.74 (1.45, 2.09) | 6.25×10 <sup>-09</sup> | 1.72 (1.43, 2.07) | 2.72×10 <sup>-08</sup> | 1.72 (1.43, 2.07) | 2.79×10 <sup>-08</sup> | 1.64 (1.35, 1.99) | 1.76×10 <sup>-06</sup> |
| 22:6, docosahexaenoic acid                      | 0.13 (0.048) mmol/L                                   | 0.79 (0.69, 0.90) | 6.60×10 <sup>-04</sup> | 0.78 (0.68, 0.89) | 4.00×10 <sup>-04</sup> | 0.68 (0.58, 0.81) | 1.53×10 <sup>-05</sup> | 0.66 (0.55, 0.79) | 1.01×10 <sup>-05</sup> | 0.66 (0.55, 0.79) | 1.01×10 <sup>-05</sup> | 0.67 (0.55, 0.82) | 1.60×10 <sup>-04</sup> |
| 3-hydroxybutyrate                               | 0.13 (0.05) mmol/L                                    | 1.16 (1.01, 1.33) | 0.05                   | 1.17 (1.02, 1.35) | 0.03                   | 1.21 (1.05, 1.39) | 0.01                   | 1.21 (1.05, 1.39) | 0.01                   | 1.21 (1.05, 1.39) | 0.01                   | 1.32 (1.15, 1.51) | 1.20×10 <sup>-04</sup> |
| Acetate                                         | 0.046 (0.079) mmol/L                                  | 1.11 (1.00, 1.22) | 0.05                   | 1.11 (1.01, 1.22) | 0.04                   | 1.06 (0.94, 1.20) | 0.35                   | 1.08 (0.95, 1.23) | 0.29                   | 1.08 (0.95, 1.23) | 0.30                   | 1.01 (0.89, 1.14) | 0.94                   |
| Acetoacetate                                    | 0.027 (0.014) mmol/L                                  | 1.57 (1.31, 1.89) | 2.28×10 <sup>-06</sup> | 1.56 (1.29, 1.88) | 7.75×10 <sup>-06</sup> | 1.34 (1.16, 1.54) | 1.10×10 <sup>-04</sup> | 1.31 (1.14, 1.51) | 4.00×10 <sup>-04</sup> | 1.31 (1.14, 1.51) | 4.20×10 <sup>-04</sup> | 1.32 (1.10, 1.58) | 5.00×10 <sup>-03</sup> |
| Alanine                                         | 0.39 (0.062) mmol/L                                   | 1.69 (1.47, 1.94) | 4.50×10 <sup>-13</sup> | 1.70 (1.48, 1.95) | 3.17×10 <sup>-13</sup> | 1.58 (1.35, 1.84) | 2.09×10 <sup>-08</sup> | 1.59 (1.35, 1.87) | 6.19×10 <sup>-08</sup> | 1.59 (1.35, 1.87) | 6.43×10 <sup>-08</sup> | 1.38 (1.15, 1.66) | 1.00×10 <sup>-03</sup> |
| Albumin                                         | 0.086 (0.0035) signal area                            | 1.11 (0.98, 1.26) | 0.12                   | 1.11 (0.98, 1.27) | 0.13                   | 1.02 (0.88, 1.18) | 0.78                   | 0.98 (0.84, 1.14) | 0.79                   | 0.98 (0.84, 1.14) | 0.80                   | 0.97 (0.82, 1.16) | 0.78                   |
| Apolipoprotein A-I                              | 1.40 (0.15) g/L                                       | 0.67 (0.59, 0.76) | 4.15×10 <sup>-09</sup> | 0.66 (0.57, 0.75) | 2.82×10 <sup>-09</sup> | 0.64 (0.54, 0.75) | 1.26×10 <sup>-07</sup> | 0.62 (0.52, 0.73) | 3.65×10 <sup>-08</sup> | 0.62 (0.52, 0.73) | 3.43×10 <sup>-08</sup> | 0.57 (0.47, 0.68) | 1.02×10 <sup>-08</sup> |
| Apolipoprotein B                                | 0.77 (0.16) g/L                                       | 1.48 (1.28, 1.71) | 1.74×10 <sup>-07</sup> | 1.46 (1.26, 1.70) | 6.81×10 <sup>-07</sup> | 1.32 (1.12, 1.55) | 1.30×10 <sup>-03</sup> | 1.28 (1.09, 1.50) | 5.00×10 <sup>-03</sup> | 1.28 (1.09, 1.50) | 5.00×10 <sup>-03</sup> | 1.29 (1.08, 1.54) | 7.70×10 <sup>-03</sup> |
| CE in chylomicrons and extremely large VLDL     | 0.0032 (0.0023) mmol/L                                | 1.85 (1.57, 2.17) | 6.91×10 <sup>-13</sup> | 1.90 (1.62, 2.23) | 1.16×10 <sup>-14</sup> | 1.64 (1.38, 1.95) | 3.86×10 <sup>-08</sup> | 1.61 (1.36, 1.91) | 1.53×10 <sup>-07</sup> | 1.61 (1.36, 1.91) | 1.51×10 <sup>-07</sup> | 1.59 (1.31, 1.93) | 5.44×10 <sup>-06</sup> |
| CE in IDL                                       | 0.38 (0.10) mmol/L                                    | 0.89 (0.77, 1.02) | 0.12                   | 0.88 (0.76, 1.02) | 0.1                    | 0.86 (0.73, 1.02) | 0.12                   | 0.83 (0.70, 0.99) | 0.05                   | 0.83 (0.70, 0.99) | 0.05                   | 0.86 (0.72, 1.04) | 0.16                   |
| CE in large HDL                                 | 0.24 (0.093) mmol/L                                   | 0.46 (0.38, 0.56) | 2.55×10 <sup>-14</sup> | 0.46 (0.38, 0.56) | 1.38×10 <sup>-14</sup> | 0.50 (0.41, 0.61) | 9.41×10 <sup>-11</sup> | 0.50 (0.40, 0.62) | 5.99×10 <sup>-10</sup> | 0.50 (0.40, 0.62) | 6.34×10 <sup>-10</sup> | 0.47 (0.37, 0.59) | 2.29×10 <sup>-09</sup> |
| CE in large LDL                                 | 0.47 (0.14) mmol/L                                    | 0.95 (0.82, 1.10) | 0.51                   | 0.94 (0.81, 1.10) | 0.47                   | 0.94 (0.79, 1.12) | 0.51                   | 0.90 (0.75, 1.08) | 0.29                   | 0.90 (0.75, 1.08) | 0.29                   | 0.93 (0.78, 1.12) | 0.5                    |
| CE in large VLDL                                | 0.039 (0.023) mmol/L                                  | 1.93 (1.64, 2.26) | 7.28×10 <sup>-15</sup> | 1.98 (1.69, 2.32) | 7.40×10 <sup>-17</sup> | 1.71 (1.44, 2.02) | 2.93×10 <sup>-09</sup> | 1.68 (1.42, 1.99) | 8.68×10 <sup>-09</sup> | 1.68 (1.42, 2.00) | 8.42×10 <sup>-09</sup> | 1.69 (1.40, 2.04) | 1.62×10 <sup>-07</sup> |
| CE in medium HDL                                | 0.31 (0.057) mmol/L                                   | 0.83 (0.73, 0.95) | 8.80×10 <sup>-03</sup> | 0.81 (0.71, 0.93) | 3.50×10 <sup>-03</sup> | 0.79 (0.68, 0.91) | 2.50×10 <sup>-03</sup> | 0.77 (0.66, 0.90) | 1.40×10 <sup>-03</sup> | 0.77 (0.66, 0.90) | 1.50×10 <sup>-03</sup> | 0.69 (0.58, 0.83) | 1.20×10 <sup>-04</sup> |
| CE in medium LDL                                | 0.26 (0.099) mmol/L                                   | 0.94 (0.81, 1.10) | 0.49                   | 0.94 (0.81, 1.10) | 0.47                   | 0.95 (0.80, 1.13) | 0.61                   | 0.92 (0.77, 1.10) | 0.38                   | 0.92 (0.77, 1.10) | 0.39                   | 0.94 (0.79, 1.13) | 0.58                   |
| CE in medium VLDL                               | 0.09 (0.04) mmol/L                                    | 1.74 (1.49, 2.03) | 4.58×10 <sup>-12</sup> | 1.75 (1.50, 2.04) | 3.91×10 <sup>-12</sup> | 1.52 (1.29, 1.80) | 1.95×10 <sup>-06</sup> | 1.51 (1.28, 1.77) | 2.76×10 <sup>-06</sup> | 1.51 (1.28, 1.78) | 2.64×10 <sup>-06</sup> | 1.58 (1.32, 1.89) | 1.77×10 <sup>-06</sup> |
| CE in small HDL                                 | 0.31 (0.054) mmol/L                                   | 0.78 (0.66, 0.92) | 3.60×10 <sup>-03</sup> | 0.77 (0.65, 0.91) | 2.60×10 <sup>-03</sup> | 0.81 (0.68, 0.97) | 0.03                   | 0.79 (0.66, 0.94) | 0.01                   | 0.79 (0.66, 0.94) | 0.01                   | 0.79 (0.65, 0.95) | 0.02                   |
| CE in small LDL                                 | 0.16 (0.06) mmol/L                                    | 0.89 (0.77, 1.04) | 0.16                   | 0.89 (0.76, 1.04) | 0.16                   | 0.91 (0.76, 1.08) | 0.31                   | 0.87 (0.73, 1.05) | 0.17                   | 0.87 (0.73, 1.05) | 0.17                   | 0.91 (0.76, 1.08) | 0.33                   |
| CE in small VLDL                                | 0.11 (0.043) mmol/L                                   | 0.99 (0.87, 1.12) | 0.85                   | 0.98 (0.86, 1.11) | 0.78                   | 0.91 (0.79, 1.06) | 0.28                   | 0.88 (0.76, 1.02) | 0.12                   | 0.88 (0.76, 1.02) | 0.12                   | 0.95 (0.80, 1.12) | 0.56                   |
| CE in very large HDL                            | 0.14 (0.056) mmol/L                                   | 0.48 (0.41, 0.56) | 5.72×10 <sup>-18</sup> | 0.48 (0.41, 0.57) | 1.93×10 <sup>-17</sup> | 0.48 (0.40, 0.58) | 3.30×10 <sup>-13</sup> | 0.47 (0.39, 0.57) | 1.49×10 <sup>-13</sup> | 0.47 (0.39, 0.57) | 1.21×10 <sup>-13</sup> | 0.47 (0.38, 0.58) | 6.28×10 <sup>-12</sup> |
| CE in very large VLDL                           | 0.0094 (0.0063) mmol/L                                | 1.82 (1.54, 2.15) | 6.51×10 <sup>-12</sup> | 1.89 (1.61, 2.22) | 2.45×10 <sup>-14</sup> | 1.63 (1.37, 1.94) | 9.61×10 <sup>-08</sup> | 1.59 (1.34, 1.89) | 4.43×10 <sup>-07</sup> | 1.60 (1.34, 1.90) | 4.36×10 <sup>-07</sup> | 1.54 (1.26, 1.87) | 5.40×10 <sup>-05</sup> |
| CE in very small VLDL                           | 0.13 (0.038) mmol/L                                   | 0.73 (0.64, 0.83) | 5.55×10 <sup>-06</sup> | 0.72 (0.63, 0.83) | 4.84×10 <sup>-06</sup> | 0.69 (0.59, 0.81) | 1.81×10 <sup>-05</sup> | 0.66 (0.56, 0.78) | 2.76×10 <sup>-06</sup> | 0.66 (0.56, 0.78) | 2.64×10 <sup>-06</sup> | 0.70 (0.58, 0.84) | 2.20×10 <sup>-04</sup> |
| CE:TL in chylomicrons and extremely large VLDL  | 10.00 (3.70) %                                        | 0.76 (0.66, 0.88) | 4.20×10 <sup>-04</sup> | 0.77 (0.67, 0.90) | 8.40×10 <sup>-04</sup> | 0.82 (0.69, 0.97) | 0.03                   | 0.84 (0.71, 1.01) | 0.08                   | 0.84 (0.71, 1.01) | 0.08                   | 0.89 (0.73, 1.08) | 0.30                   |
| CE:TL in IDL                                    | 44.00 (2.30) %                                        | 0.89 (0.79, 1.01) | 0.09                   | 0.89 (0.78, 1.01) | 0.09                   | 0.85 (0.73, 0.98) | 0.03                   | 0.81 (0.70, 0.94) | 9.50×10 <sup>-03</sup> | 0.81 (0.70, 0.94) | 9.60×10 <sup>-03</sup> | 0.81 (0.68, 0.96) | 0.03                   |
| CE:TL in large HDL                              | 37.00 (2.20) %                                        | 0.62 (0.54, 0.72) | 8.34×10 <sup>-10</sup> | 0.61 (0.53, 0.71) | 2.38×10 <sup>-10</sup> | 0.66 (0.56, 0.78) | 8.74×10 <sup>-07</sup> | 0.69 (0.58, 0.81) | 1.91×10 <sup>-05</sup> | 0.69 (0.58, 0.81) | 1.71×10 <sup>-05</sup> | 0.68 (0.57, 0.81) | 2.52×10 <sup>-05</sup> |
| CE:TL in large LDL                              | 46.00 (3.00) %                                        | 0.86 (0.73, 1.01) | 0.09                   | 0.87 (0.73, 1.03) | 0.12                   | 0.87 (0.72, 1.05) | 0.17                   | 0.83 (0.68, 1.00) | 0.06                   | 0.83 (0.68, 1.00) | 0.06                   | 0.84 (0.70, 1.02) | 0.12                   |
| CE:TL in large VLDL                             | 14.00 (2.10) %                                        | 0.63 (0.54, 0.73) | 1.47×10 <sup>-08</sup> | 0.62 (0.53, 0.73) | 2.14×10 <sup>-08</sup> | 0.75 (0.63, 0.91) | 4.10×10 <sup>-03</sup> | 0.80 (0.67, 0.96) | 0.03                   | 0.80 (0.67, 0.96) | 0.03                   | 0.88 (0.72, 1.08) | 0.27                   |
| CE:TL ratio in medium HDL                       | 40.00 (2.50) %                                        | 0.71 (0.62, 0.82) | 3.50×10 <sup>-06</sup> | 0.71 (0.62, 0.81) | 1.30×10 <sup>-06</sup> | 0.75 (0.64, 0.87) | 3.60×10 <sup>-04</sup> | 0.75 (0.64, 0.88) | 6.00×10 <sup>-04</sup> | 0.75 (0.64, 0.88) | 6.10×10 <sup>-04</sup> | 0.64 (0.56, 0.73) | 1.91×10 <sup>-10</sup> |
| CE:TL ratio in medium LDL                       | 43.00 (6.90) %                                        | 0.80 (0.69, 0.92) | 2.60×10 <sup>-03</sup> | 0.80 (0.69, 0.93) | 5.70×10 <sup>-03</sup> | 0.84 (0.71, 0.99) | 0.05                   | 0.82 (0.70, 0.97) | 0.03                   | 0.82 (0.70, 0.97) | 0.03                   | 0.85 (0.72, 1.00) | 0.08                   |
| CE:TL ratio in medium VLDL                      | 16.00 (2.90) %                                        | 0.64 (0.55, 0.74) | 3.08×10 <sup>-09</sup> | 0.63 (0.54, 0.74) | 8.59×10 <sup>-09</sup> | 0.72 (0.61, 0.85) | 1.50×10 <sup>-04</sup> | 0.73 (0.62, 0.87) | 7.70×10 <sup>-04</sup> | 0.73 (0.62, 0.87) | 7.90×10 <sup>-04</sup> | 0.78 (0.65, 0.95) | 0.02                   |
| CE:TL ratio in small HDL                        | 30.00 (4.60) %                                        | 0.63 (0.53, 0.75) | 4.31×10 <sup>-07</sup> | 0.62 (0.52, 0.73) | 5.42×10 <sup>-08</sup> | 0.69 (0.57, 0.83) | 2.10×10 <sup>-04</sup> | 0.69 (0.57, 0.84) | 2.40×10 <sup>-04</sup> | 0.69 (0.57, 0.83) | 2.40×10 <sup>-04</sup> | 0.74 (0.60, 0.90) | 4.90×10 <sup>-03</sup> |
| CE:TL ratio in small LDL                        | 41.00 (7.30) %                                        | 0.77 (0.67, 0.88) | 4.10×10 <sup>-04</sup> | 0.77 (0.67, 0.90) | 9.50×10 <sup>-04</sup> | 0.82 (0.69, 0.96) | 0.02                   | 0.80 (0.68, 0.95) | 0.01                   | 0.80 (0.68, 0.95) | 0.01                   | 0.84 (0.71, 0.99) | 0.06                   |
| CE:TL ratio in small VLDL                       | 20.00 (5.20) %                                        | 0.58 (0.50, 0.68) | 5.18×10 <sup>-12</sup> | 0.56 (0.48, 0.66) | 1.23×10 <sup>-12</sup> | 0.59 (0.49, 0.70) | 9.46×10 <sup>-09</sup> | 0.57 (0.48, 0.69) | 8.23×10 <sup>-09</sup> | 0.57 (0.48, 0.69) | 6.78×10 <sup>-09</sup> | 0.58 (0.48, 0.70) | 7.97×10 <sup>-08</sup> |
| CE:TL ratio in very large HDL                   | 33.00 (4.80) %                                        | 1.06 (0.88, 1.27) | 0.57                   | 1.06 (0.88, 1.28) | 0.56                   | 0.93 (0.76, 1.14) | 0.53                   | 0.88 (0.72, 1.08) | 0.25                   | 0.88 (0.72, 1.08) | 0.25                   | 0.91 (0.73, 1.13) | 0.45                   |
| CE:TL ratio in very large VLDL                  | 13.00 (3.30) %                                        | 0.65 (0.55, 0.77) | 2.08×10 <sup>-06</sup> | 0.65 (0.54, 0.77) | 1.95×10 <sup>-06</sup> | 0.74 (0.62, 0.90) | 3.40×10 <sup>-03</sup> | 0.79 (0.65, 0.95) | 0.02                   | 0.79 (0.65, 0.95) | 0.02                   | 0.88 (0.74, 1.06) | 0.22                   |
| CE:TL ratio in very small VLDL                  | 32.00 (4.00) %                                        | 0.56 (0.46, 0.68) | 1.05×10 <sup>-08</sup> | 0.54 (0.46, 0.63) | 4.70×10 <sup>-14</sup> | 0.56 (0.47, 0.66) | 1.13×10 <sup>-10</sup> | 0.55 (0.46, 0.65) | 8.93×10 <sup>-11</sup> | 0.55 (0.46, 0.65) | 8.02×10 <sup>-11</sup> | 0.55 (0.46, 0.66) | 1.49×10 <sup>-09</sup> |
| Citrate                                         | 0.15 (0.021) mmol/L                                   | 1.10 (0.98, 1.24) | 0.14                   | 1.10 (0.97, 1.25) | 0.14                   | 1.08 (0.94, 1.25) | 0.29                   | 1.12 (0.96, 1.29) | 0.17                   | 1.11 (0.96, 1.29) | 0.17                   | 1.05 (0.89, 1.24) | 0.60                   |
| Chylomicrons and extremely large VLDL particles | 1.5e×10 <sup>-10</sup> (1.1×10 <sup>-10</sup> ) mol/L | 2.05 (1.73, 2.44) | 2.26×10 <sup>-15</sup> | 2.19 (1.86, 2.58) | 1.03×10 <sup>-19</sup> | 1.87 (1.57, 2.24) | 2.65×10 <sup>-11</sup> | 1.81 (1.52, 2.17) | 4.99×10 <sup>-10</sup> | 1.82 (1.52, 2.17) | 4.93×10 <sup>-10</sup> | 1.68 (1.38, 2.06) | 1.21×10 <sup>-06</sup> |
| IDL particles                                   | 8.6e-08 (2e-08) mol/L                                 | 0.95 (0.82, 1.10) | 0.54                   | 0.94 (0.81, 1.10) | 0.47                   | 0.94 (0.79, 1.12) | 0.53                   | 0.91 (0.77, 1.08) | 0.34                   | 0.91 (0.77, 1.08) | 0.34                   | 0.95 (0.79, 1.14) | 0.61                   |
| Large HDL particles                             | 1×10 <sup>-6</sup> (x10 <sup>-7</sup> ) mol/L         | 0.48 (0.39, 0.58) | 9.74×10 <sup>-14</sup> | 0.47 (0.39, 0.57) | 4.72×10 <sup>-14</sup> | 0.50 (0.41, 0.62) | 9.79×10 <sup>-11</sup> | 0.50 (0.41, 0.62) | 5.03×10 <sup>-10</sup> | 0.50 (0.41, 0.62) | 5.30×10 <sup>-10</sup> | 0.47 (0.37, 0.59) | 1.16×10 <sup>-09</sup> |
| Large LDL particles                             | 1.4×10 <sup>-7</sup> (3.5×10 <sup>-8</sup> ) mol/L    | 0.99 (0.85, 1.15) | 0.87                   | 0.98 (0.84, 1.14) | 0.79                   | 0.98 (0.82, 1.16) | 0.80                   | 0.94 (0.79, 1.12) | 0.53                   | 0.94 (0.79, 1.12) | 0.53                   | 0.97 (0.81, 1.17) | 0.79                   |
| Large VLDL particles                            | 5.1×10 <sup>-9</sup> (3.4×10 <sup>-9</sup> ) mol/L    | 1.97 (1.67, 2.31) | 1.64×10 <sup>-15</sup> | 2.05 (1.76, 2.39) | 5.17×10 <sup>-19</sup> | 1.75 (1.48, 2.07) | 3.41×10 <sup>-10</sup> | 1.70 (1.44, 2.02) | 3.64×10 <sup>-09</sup> | 1.71 (1.44, 2.02) | 3.67×10 <sup>-09</sup> | 1.65 (1.36, 1.99) | 1.09×10 <sup>-06</sup> |
| Medium HDL particles                            | 1.8×10 <sup>-6</sup> (2.9×10 <sup>-7</sup> ) mol/L    | 1.02 (0.89, 1.17) | 0.79                   | 0.99 (0.86, 1.14) | 0.90                   | 0.92 (0.79, 1.07) | 0.32                   | 0.90 (0.77, 1.05) | 0.22                   | 0.90 (0.77, 1.05) | 0.22                   | 0.81 (0.68, 0.96) | 0.03                   |
| Medium LDL particles                            | 1.1×10 <sup>-7</sup> (3×10 <sup>-8</sup> ) mol/L      | 1.08 (0.93, 1.24) | 0.35                   | 1.07 (0.92, 1.24) | 0.43                   | 1.06 (0.90, 1.26) | 0.52                   | 1.02 (0.86, 1.22) | 0.81                   | 1.02 (0.86, 1.22) | 0.8                    | 1.04 (0.87, 1.24) | 0.72                   |
| Medium VLDL particles                           | 1.8×10 <sup>-8</sup> (8.8×10 <sup>-9</sup> ) mol/L    | 2.00 (1.71, 2.35) | 2.02×10 <sup>-16</sup> | 2.07 (1.77, 2.41) | 3.69×10 <sup>-19</sup> | 1.75 (1.48, 2.07) | 3.22×10 <sup>-10</sup> | 1.71 (1.44, 2.03) | 3.15×10 <sup>-09</sup> | 1.71 (1.45, 2.03) | 2.93×10 <sup>-09</sup> | 1.72 (1.42, 2.07) | 7.80×10 <sup>-08</sup> |
| Small HDL particles                             |                                                       |                   |                        |                   |                        |                   |                        |                   |                        |                   |                        |                   |                        |

| Metabolic biomarker                               | Mean (SD)              | Model A           |                        | Model B           |                        | Model C1          |                        | Model C2          |                        | Model C3          |                        | Model D           |                        |
|---------------------------------------------------|------------------------|-------------------|------------------------|-------------------|------------------------|-------------------|------------------------|-------------------|------------------------|-------------------|------------------------|-------------------|------------------------|
|                                                   |                        | HR* (95% CI)      | p-value†               | HR* (95% CI)      | p-value†               | HR* (95% CI)      | p-value†               | HR* (95% CI)      | p-value†               | HR* (95% CI)      | p-value†               | HR* (95% CI)      | p-value†               |
| FC in chylomicrons and extremely large VLDL       | 0.0022 (0.0018) mmol/L | 1.98 (1.67, 2.35) | 2.05×10 <sup>-14</sup> | 2.10 (1.79, 2.46) | 9.54×10 <sup>-19</sup> | 1.79 (1.51, 2.14) | 2.56×10 <sup>-10</sup> | 1.74 (1.46, 2.07) | 4.18×10 <sup>-09</sup> | 1.74 (1.46, 2.07) | 4.14×10 <sup>-09</sup> | 1.62 (1.32, 1.98) | 7.25×10 <sup>-06</sup> |
| FC in IDL                                         | 0.15 (0.042) mmol/L    | 0.69 (0.58, 0.81) | 2.04×10 <sup>-05</sup> | 0.68 (0.57, 0.80) | 1.36×10 <sup>-05</sup> | 0.71 (0.59, 0.86) | 8.20×10 <sup>-04</sup> | 0.70 (0.57, 0.84) | 4.40×10 <sup>-04</sup> | 0.70 (0.57, 0.84) | 4.40×10 <sup>-04</sup> | 0.73 (0.60, 0.88) | 2.80×10 <sup>-03</sup> |
| FC in large HDL                                   | 0.064 (0.029) mmol/L   | 0.40 (0.32, 0.50) | 5.47×10 <sup>-16</sup> | 0.40 (0.32, 0.49) | 1.13×10 <sup>-16</sup> | 0.43 (0.35, 0.53) | 4.76×10 <sup>-13</sup> | 0.43 (0.34, 0.54) | 2.53×10 <sup>-12</sup> | 0.43 (0.34, 0.54) | 3.00×10 <sup>-12</sup> | 0.40 (0.31, 0.52) | 1.73×10 <sup>-11</sup> |
| FC in large LDL                                   | 0.19 (0.047) mmol/L    | 0.74 (0.63, 0.88) | 6.00×10 <sup>-04</sup> | 0.74 (0.63, 0.88) | 7.10×10 <sup>-04</sup> | 0.77 (0.64, 0.94) | 0.01                   | 0.75 (0.62, 0.91) | 6.10×10 <sup>-03</sup> | 0.75 (0.62, 0.91) | 6.20×10 <sup>-03</sup> | 0.80 (0.66, 0.97) | 0.03                   |
| FC in large VLDL                                  | 0.028 (0.023) mmol/L   | 1.95 (1.66, 2.29) | 2.80×10 <sup>-15</sup> | 2.03 (1.74, 2.37) | 9.72×10 <sup>-19</sup> | 1.73 (1.46, 2.05) | 6.82×10 <sup>-10</sup> | 1.69 (1.42, 2.00) | 6.45×10 <sup>-09</sup> | 1.69 (1.42, 2.00) | 6.64×10 <sup>-09</sup> | 1.62 (1.34, 1.96) | 2.56×10 <sup>-06</sup> |
| FC in medium HDL                                  | 0.064 (0.015) mmol/L   | 0.80 (0.70, 0.92) | 3.20×10 <sup>-03</sup> | 0.78 (0.67, 0.90) | 8.50×10 <sup>-04</sup> | 0.75 (0.64, 0.88) | 8.20×10 <sup>-04</sup> | 0.74 (0.63, 0.87) | 4.60×10 <sup>-04</sup> | 0.74 (0.63, 0.87) | 4.60×10 <sup>-04</sup> | 0.66 (0.55, 0.80) | 3.40×10 <sup>-05</sup> |
| FC in medium LDL                                  | 0.11 (0.022) mmol/L    | 0.96 (0.83, 1.10) | 0.57                   | 0.95 (0.82, 1.10) | 0.52                   | 0.95 (0.80, 1.13) | 0.59                   | 0.91 (0.76, 1.09) | 0.34                   | 0.91 (0.77, 1.09) | 0.35                   | 0.93 (0.78, 1.11) | 0.48                   |
| FC in medium VLDL                                 | 0.066 (0.037) mmol/L   | 1.98 (1.69, 2.33) | 5.34×10 <sup>-16</sup> | 2.04 (1.75, 2.38) | 9.72×10 <sup>-19</sup> | 1.73 (1.46, 2.05) | 7.33×10 <sup>-10</sup> | 1.69 (1.43, 2.00) | 6.09×10 <sup>-09</sup> | 1.69 (1.43, 2.01) | 5.61×10 <sup>-09</sup> | 1.70 (1.40, 2.05) | 1.61×10 <sup>-07</sup> |
| FC in small HDL                                   | 0.10 (0.012) mmol/L    | 1.28 (1.13, 1.46) | 2.70×10 <sup>-04</sup> | 1.27 (1.11, 1.44) | 6.70×10 <sup>-04</sup> | 1.11 (0.96, 1.28) | 0.19                   | 1.07 (0.92, 1.24) | 0.43                   | 1.07 (0.92, 1.24) | 0.43                   | 0.96 (0.81, 1.14) | 0.72                   |
| FC in small LDL                                   | 0.066 (0.013) mmol/L   | 0.94 (0.82, 1.08) | 0.40                   | 0.93 (0.81, 1.07) | 0.36                   | 0.92 (0.78, 1.09) | 0.37                   | 0.88 (0.74, 1.04) | 0.17                   | 0.88 (0.74, 1.04) | 0.17                   | 0.89 (0.75, 1.06) | 0.24                   |
| FC in small VLDL                                  | 0.074 (0.024) mmol/L   | 1.56 (1.33, 1.82) | 5.34×10 <sup>-08</sup> | 1.56 (1.35, 1.82) | 1.13×10 <sup>-08</sup> | 1.39 (1.18, 1.63) | 1.10×10 <sup>-04</sup> | 1.37 (1.17, 1.60) | 2.00×10 <sup>-04</sup> | 1.37 (1.17, 1.60) | 2.00×10 <sup>-04</sup> | 1.42 (1.19, 1.69) | 2.00×10 <sup>-04</sup> |
| FC in very large HDL                              | 0.051 (0.023) mmol/L   | 0.46 (0.39, 0.54) | 7.51×10 <sup>-18</sup> | 0.46 (0.39, 0.55) | 1.93×10 <sup>-17</sup> | 0.48 (0.39, 0.58) | 4.34×10 <sup>-13</sup> | 0.47 (0.38, 0.57) | 3.65×10 <sup>-13</sup> | 0.47 (0.39, 0.57) | 3.47×10 <sup>-13</sup> | 0.47 (0.38, 0.58) | 2.61×10 <sup>-11</sup> |
| FC in very large VLDL                             | 0.0066 (0.0055) mmol/L | 1.86 (1.60, 2.20) | 8.15×10 <sup>-13</sup> | 1.94 (1.66, 2.28) | 9.24×10 <sup>-15</sup> | 1.65 (1.39, 1.97) | 3.86×10 <sup>-08</sup> | 1.61 (1.35, 1.91) | 3.16×10 <sup>-07</sup> | 1.61 (1.35, 1.92) | 3.09×10 <sup>-07</sup> | 1.50 (1.23, 1.84) | 1.70×10 <sup>-04</sup> |
| FC in very small VLDL                             | 0.061 (0.017) mmol/L   | 0.77 (0.66, 0.89) | 1.10×10 <sup>-03</sup> | 0.76 (0.65, 0.89) | 7.80×10 <sup>-04</sup> | 0.74 (0.62, 0.89) | 1.90×10 <sup>-03</sup> | 0.71 (0.60, 0.86) | 6.10×10 <sup>-04</sup> | 0.72 (0.60, 0.86) | 6.20×10 <sup>-04</sup> | 0.75 (0.63, 0.91) | 5.50×10 <sup>-03</sup> |
| FC:TL in chylomicrons and extremely large VLDL    | 6.10 (2.00) %          | 1.14 (1.02, 1.26) | 0.02                   | 1.14 (1.03, 1.27) | 0.02                   | 1.10 (1.00, 1.22) | 0.08                   | 1.11 (1.00, 1.23) | 0.06                   | 1.11 (1.00, 1.23) | 0.06                   | 1.10 (0.98, 1.24) | 0.13                   |
| FC:TL in IDL                                      | 17.00 (1.80) %         | 0.57 (0.47, 0.70) | 4.28×10 <sup>-08</sup> | 0.54 (0.45, 0.66) | 9.10×10 <sup>-10</sup> | 0.59 (0.48, 0.72) | 8.74×10 <sup>-07</sup> | 0.59 (0.48, 0.73) | 1.35×10 <sup>-06</sup> | 0.59 (0.48, 0.73) | 1.36×10 <sup>-06</sup> | 0.58 (0.49, 0.71) | 7.97×10 <sup>-08</sup> |
| FC:TL in large HDL                                | 9.60 (1.50) %          | 0.44 (0.36, 0.54) | 1.64×10 <sup>-15</sup> | 0.42 (0.35, 0.51) | 2.81×10 <sup>-17</sup> | 0.44 (0.36, 0.53) | 1.07×10 <sup>-15</sup> | 0.45 (0.37, 0.54) | 6.73×10 <sup>-14</sup> | 0.45 (0.37, 0.54) | 3.75×10 <sup>-14</sup> | 0.43 (0.35, 0.53) | 1.40×10 <sup>-14</sup> |
| FC:TL in large LDL                                | 19.00 (1.20) %         | 0.46 (0.38, 0.56) | 1.19×10 <sup>-13</sup> | 0.43 (0.36, 0.52) | 1.73×10 <sup>-19</sup> | 0.49 (0.41, 0.60) | 5.04×10 <sup>-12</sup> | 0.51 (0.42, 0.62) | 1.00×10 <sup>-10</sup> | 0.51 (0.42, 0.62) | 1.07×10 <sup>-10</sup> | 0.53 (0.43, 0.66) | 1.96×10 <sup>-08</sup> |
| FC:TL in large VLDL                               | 8.50 (2.20) %          | 1.90 (1.60, 2.26) | 9.92×10 <sup>-13</sup> | 1.89 (1.59, 2.24) | 7.75×10 <sup>-13</sup> | 1.58 (1.32, 1.89) | 1.50×10 <sup>-06</sup> | 1.51 (1.27, 1.81) | 1.12×10 <sup>-05</sup> | 1.51 (1.27, 1.81) | 1.19×10 <sup>-05</sup> | 1.42 (1.18, 1.73) | 5.70×10 <sup>-04</sup> |
| FC:TL in medium HDL                               | 8.20 (0.66) %          | 0.56 (0.48, 0.66) | 2.93×10 <sup>-12</sup> | 0.54 (0.46, 0.63) | 1.08×10 <sup>-14</sup> | 0.55 (0.47, 0.65) | 2.48×10 <sup>-11</sup> | 0.54 (0.45, 0.64) | 2.35×10 <sup>-11</sup> | 0.54 (0.45, 0.64) | 2.51×10 <sup>-11</sup> | 0.49 (0.40, 0.59) | 1.00×10 <sup>-12</sup> |
| FC:TL in medium LDL                               | 20.00 (1.90) %         | 0.85 (0.72, 1.00) | 0.06                   | 0.85 (0.72, 1.00) | 0.06                   | 0.87 (0.73, 1.03) | 0.13                   | 0.89 (0.76, 1.06) | 0.23                   | 0.89 (0.75, 1.06) | 0.23                   | 0.87 (0.72, 1.05) | 0.18                   |
| FC:TL in medium VLDL                              | 11.00 (1.00) %         | 1.87 (1.57, 2.22) | 6.54×10 <sup>-12</sup> | 1.84 (1.56, 2.19) | 4.72×10 <sup>-12</sup> | 1.53 (1.28, 1.84) | 1.08×10 <sup>-05</sup> | 1.46 (1.22, 1.76) | 1.20×10 <sup>-04</sup> | 1.46 (1.22, 1.76) | 1.20×10 <sup>-04</sup> | 1.48 (1.20, 1.82) | 5.70×10 <sup>-04</sup> |
| FC:TL in small HDL                                | 9.80 (0.55) %          | 0.90 (0.77, 1.05) | 0.20                   | 0.89 (0.76, 1.04) | 0.16                   | 0.81 (0.68, 0.97) | 0.03                   | 0.82 (0.68, 0.98) | 0.04                   | 0.82 (0.68, 0.97) | 0.03                   | 0.76 (0.63, 0.93) | 0.01                   |
| FC:TL in small LDL                                | 18.00 (1.40) %         | 0.80 (0.68, 0.94) | 9.40×10 <sup>-03</sup> | 0.80 (0.68, 0.94) | 9.10×10 <sup>-03</sup> | 0.83 (0.70, 0.98) | 0.04                   | 0.85 (0.72, 1.00) | 0.07                   | 0.85 (0.72, 1.00) | 0.07                   | 0.81 (0.67, 0.98) | 0.05                   |
| FC:TL in small VLDL                               | 13.00 (0.67) %         | 0.62 (0.54, 0.72) | 1.23×10 <sup>-10</sup> | 0.60 (0.52, 0.70) | 2.26×10 <sup>-11</sup> | 0.62 (0.52, 0.73) | 2.24×10 <sup>-08</sup> | 0.60 (0.50, 0.71) | 2.72×10 <sup>-08</sup> | 0.60 (0.50, 0.71) | 2.79×10 <sup>-08</sup> | 0.60 (0.50, 0.72) | 7.39×10 <sup>-08</sup> |
| FC:TL in very large HDL                           | 12.00 (1.30) %         | 0.69 (0.59, 0.81) | 7.52×10 <sup>-06</sup> | 0.69 (0.59, 0.81) | 7.75×10 <sup>-06</sup> | 0.71 (0.61, 0.83) | 3.51×10 <sup>-05</sup> | 0.70 (0.60, 0.82) | 1.83×10 <sup>-05</sup> | 0.70 (0.60, 0.82) | 1.82×10 <sup>-05</sup> | 0.70 (0.60, 0.81) | 4.86×10 <sup>-06</sup> |
| FC:TL in very large VLDL                          | 7.50 (2.00) %          | 1.35 (1.19, 1.55) | 1.21×10 <sup>-05</sup> | 1.34 (1.17, 1.54) | 6.19×10 <sup>-05</sup> | 1.24 (1.04, 1.49) | 0.03                   | 1.23 (1.03, 1.47) | 0.03                   | 1.23 (1.03, 1.48) | 0.03                   | 1.10 (0.93, 1.31) | 0.30                   |
| FC:TL in very small VLDL                          | 15.00 (1.40) %         | 0.66 (0.55, 0.80) | 2.84×10 <sup>-05</sup> | 0.64 (0.53, 0.78) | 1.03×10 <sup>-05</sup> | 0.67 (0.55, 0.82) | 1.60×10 <sup>-04</sup> | 0.68 (0.56, 0.82) | 1.60×10 <sup>-04</sup> | 0.67 (0.56, 0.82) | 1.60×10 <sup>-04</sup> | 0.64 (0.53, 0.76) | 2.89×10 <sup>-06</sup> |
| Glucose                                           | 4.10 (1.90) mmol/L     | 3.45 (2.67, 4.46) | 2.60×10 <sup>-19</sup> | 3.64 (2.82, 4.69) | 1.70×10 <sup>-21</sup> | 3.67 (2.82, 4.78) | 1.27×10 <sup>-19</sup> | 3.49 (2.70, 4.52) | 6.57×10 <sup>-19</sup> | 3.53 (2.72, 4.58) | 7.14×10 <sup>-19</sup> | N/A               | N/A                    |
| Glutamine                                         | 0.46 (0.066) mmol/L    | 1.15 (1.01, 1.31) | 0.05                   | 1.18 (1.04, 1.35) | 0.02                   | 1.21 (1.05, 1.40) | 0.02                   | 1.22 (1.05, 1.43) | 0.04                   | 1.22 (1.05, 1.42) | 0.01                   | 1.17 (0.98, 1.40) | 0.12                   |
| Glycoprotein acetyls, mainly a1-acid glycoprotein | 1.20 (0.24) mmol/L     | 1.20 (1.06, 1.35) | 5.80×10 <sup>-03</sup> | 1.20 (1.06, 1.36) | 6.70×10 <sup>-03</sup> | 1.00 (0.87, 1.16) | 0.99                   | 0.95 (0.81, 1.11) | 0.53                   | 0.95 (0.81, 1.11) | 0.53                   | 0.94 (0.79, 1.11) | 0.53                   |
| Histidine                                         | 0.058 (0.006) mmol/L   | 1.10 (0.97, 1.25) | 0.15                   | 1.12 (0.98, 1.27) | 0.1                    | 1.11 (0.96, 1.29) | 0.19                   | 1.12 (0.96, 1.31) | 0.17                   | 1.12 (0.96, 1.31) | 0.17                   | 1.09 (0.91, 1.30) | 0.40                   |
| Isoleucine                                        | 0.061 (0.021) mmol/L   | 1.98 (1.65, 2.37) | 6.32×10 <sup>-13</sup> | 2.15 (1.82, 2.54) | 3.21×10 <sup>-18</sup> | 1.79 (1.49, 2.16) | 3.45×10 <sup>-09</sup> | 1.75 (1.45, 2.12) | 2.27×10 <sup>-08</sup> | 1.76 (1.46, 2.13) | 2.32×10 <sup>-08</sup> | 1.64 (1.33, 2.03) | 1.29×10 <sup>-05</sup> |
| Lactate                                           | 2.40 (0.77) mmol/L     | 1.45 (1.28, 1.65) | 3.47×10 <sup>-08</sup> | 1.43 (1.25, 1.63) | 2.41×10 <sup>-07</sup> | 1.54 (1.33, 1.78) | 3.51×10 <sup>-08</sup> | 1.47 (1.26, 1.72) | 2.22×10 <sup>-06</sup> | 1.49 (1.28, 1.74) | 9.78×10 <sup>-07</sup> | 1.60 (1.33, 1.91) | 1.21×10 <sup>-06</sup> |
| Leucine                                           | 0.071 (0.021) mmol/L   | 2.06 (1.73, 2.46) | 2.15×10 <sup>-15</sup> | 2.19 (1.86, 2.57) | 6.16×10 <sup>-20</sup> | 1.85 (1.54, 2.21) | 1.40×10 <sup>-10</sup> | 1.81 (1.51, 2.18) | 1.79×10 <sup>-09</sup> | 1.82 (1.51, 2.20) | 1.99×10 <sup>-09</sup> | 1.65 (1.34, 2.03) | 5.31×10 <sup>-06</sup> |
| Mean diameter for HDL particles                   | 9.90 (0.22) nm         | 0.43 (0.36, 0.51) | 5.72×10 <sup>-18</sup> | 0.42 (0.35, 0.50) | 9.14×10 <sup>-19</sup> | 0.44 (0.36, 0.54) | 3.49×10 <sup>-14</sup> | 0.43 (0.35, 0.53) | 1.11×10 <sup>-13</sup> | 0.43 (0.35, 0.53) | 1.11×10 <sup>-13</sup> | 0.42 (0.33, 0.53) | 2.24×10 <sup>-12</sup> |
| Mean diameter for LDL particles                   | 24.00 (0.10) nm        | 0.84 (0.72, 0.98) | 0.04                   | 0.84 (0.72, 0.98) | 0.03                   | 0.91 (0.77, 1.07) | 0.29                   | 0.95 (0.80, 1.13) | 0.58                   | 0.95 (0.80, 1.12) | 0.57                   | 1.03 (0.86, 1.24) | 0.75                   |
| Mean diameter for VLDL particles                  | 37.00 (1.30) nm        | 1.97 (1.66, 2.34) | 4.90×10 <sup>-14</sup> | 2.07 (1.76, 2.44) | 1.93×10 <sup>-17</sup> | 1.79 (1.50, 2.13) | 6.97×10 <sup>-10</sup> | 1.73 (1.44, 2.08) | 1.32×10 <sup>-08</sup> | 1.74 (1.45, 2.08) | 1.34×10 <sup>-08</sup> | 1.68 (1.38, 2.04) | 9.09×10 <sup>-07</sup> |
| Monounsaturated fatty acids; 16:1, 18:1           | 3.00 (0.73) mmol/L     | 1.73(1.48, 2.02)  | 1.57×10 <sup>-11</sup> | 1.74 (1.50, 2.03) | 2.03×10 <sup>-12</sup> | 1.50 (1.27, 1.77) | 3.59×10 <sup>-06</sup> | 1.47 (1.25, 1.73) | 9.70×10 <sup>-06</sup> | 1.47 (1.25, 1.73) | 9.16×10 <sup>-06</sup> | 1.48 (1.23, 1.77) | 5.82×10 <sup>-05</sup> |
| Omega-3 fatty acids                               | 0.41 (0.15) mmol/L     | 1.27 (1.09, 1.48) | 2.50×10 <sup>-03</sup> | 1.25 (1.07, 1.46) | 0.01                   | 1.07 (0.90, 1.27) | 0.5                    | 1.05 (0.88, 1.25) | 0.58                   | 1.05 (0.88, 1.25) | 0.59                   | 0.98 (0.81, 1.19) | 0.87                   |
| Omega-6 fatty acids                               | 3.20 (0.59) mmol/L     | 1.88 (1.60, 2.20) | 5.03×10 <sup>-14</sup> | 1.85 (1.57, 2.18) | 5.16×10 <sup>-13</sup> | 1.72 (1.44, 2.05) | 6.25×10 <sup>-09</sup> | 1.71 (1.43, 2.05) | 1.81×10 <sup>-08</sup> | 1.71 (1.43, 2.05) | 1.89×10 <sup>-08</sup> | 1.60 (1.32, 1.93) | 3.23×10 <sup>-06</sup> |
| Phenylalanine                                     | 0.061 (0.0094) mmol/L  | 1.49 (1.30, 1.71) | 2.36×10 <sup>-08</sup> | 1.53 (1.33, 1.76) | 5.22×10 <sup>-09</sup> | 1.31 (1.10, 1.56) | 4.10×10 <sup>-03</sup> | 1.36 (1.15, 1.61) | 5.10×10 <sup>-04</sup> | 1.37 (1.16, 1.62) | 4.20×10 <sup>-04</sup> | 1.29 (1.05, 1.58) | 0.03                   |
| Phosphatidylcholine and other cholines            | 1.60 (0.23) mmol/L     | 1.50 (1.30, 1.74) | 1.17×10 <sup>-07</sup> | 1.48 (1.27, 1.72) | 7.18×10 <sup>-07</sup> | 1.45 (1.23, 1.70) | 1.78×10 <sup>-05</sup> | 1.44 (1.22, 1.70) | 3.46×10 <sup>-05</sup> | 1.44 (1.22, 1.70) | 3.47×10 <sup>-05</sup> | 1.30 (1.08, 1.57) | 8.30×10 <sup>-03</sup> |
| PL in chylomicrons and extremely large VLDL       | 0.0037 (0.003) mmol/L  | 2.03 (1.71, 2.41) | 6.05×10 <sup>-15</sup> | 2.16 (1.83, 2.54) | 2.67×10 <sup>-19</sup> | 1.85 (1.55, 2.20) | 6.58×10 <sup>-11</sup> | 1.79 (1.49, 2.14) | 1.22×10 <sup>-09</sup> | 1.79 (1.49, 2.14) | 1.21×10 <sup>-09</sup> | 1.65 (1.35, 2.02) | 3.41×10 <sup>-06</sup> |
| PL in IDL                                         | 0.24 (0.053) mmol/L    | 0.87 (0.74, 1.01) | 0.08                   | 0.86 (0.73, 1.01) | 0.07                   | 0.88 (0.74, 1.06) | 0.22                   | 0.86 (0.72, 1.03) | 0.13                   | 0.86 (0.72, 1.03) | 0.13                   | 0.89 (0.74, 1.08) | 0.29                   |
| PL in large HDL                                   | 0.32 (0.10) mmol/L     | 0.47 (0.39, 0.57) | 6.35×10 <sup>-14</sup> | 0.46 (0.38, 0     |                        |                   |                        |                   |                        |                   |                        |                   |                        |

| Metabolic biomarker                                 | Mean (SD)             | Model A           |                        | Model B           |                        | Model C1          |                        | Model C2          |                        | Model C3          |                        | Model D           |                        |
|-----------------------------------------------------|-----------------------|-------------------|------------------------|-------------------|------------------------|-------------------|------------------------|-------------------|------------------------|-------------------|------------------------|-------------------|------------------------|
|                                                     |                       | HR* (95% CI)      | p-value†               | HR* (95% CI)      | p-value†               | HR* (95% CI)      | p-value†               | HR* (95% CI)      | p-value†               | HR* (95% CI)      | p-value†               | HR* (95% CI)      | p-value†               |
| PL:TL in chylomicrons and extremely large VLDL      | 10.00 (2.30) %        | 1.82 (1.54, 2.15) | 6.16x10 <sup>-12</sup> | 1.82 (1.54, 2.15) | 9.60x10 <sup>-12</sup> | 1.53 (1.29, 1.82) | 3.27x10 <sup>-06</sup> | 1.47 (1.23, 1.76) | 6.53x10 <sup>-05</sup> | 1.47 (1.23, 1.76) | 6.69x10 <sup>-05</sup> | 1.37 (1.12, 1.66) | 3.60x10 <sup>-03</sup> |
| PL:TL in large VLDL                                 | 28.00 (1.10) %        | 2.24 (1.81, 2.79) | 8.09x10 <sup>-13</sup> | 2.22 (1.78, 2.76) | 2.03x10 <sup>-12</sup> | 2.07 (1.61, 2.65) | 3.18x10 <sup>-08</sup> | 1.96 (1.53, 2.51) | 2.91x10 <sup>-07</sup> | 1.97 (1.53, 2.52) | 2.81x10 <sup>-07</sup> | 1.85 (1.41, 2.43) | 2.64x10 <sup>-05</sup> |
| PL:TL in medium HDL                                 | 50.00 (2.90) %        | 1.16 (1.03, 1.31) | 0.02                   | 1.16 (1.03, 1.30) | 0.02                   | 1.14 (1.00, 1.30) | 0.08                   | 1.14 (1.00, 1.31) | 0.07                   | 1.14 (1.00, 1.31) | 0.07                   | 1.26 (1.09, 1.45) | 3.20x10 <sup>-03</sup> |
| PL:TL in medium LDL                                 | 27.00 (1.60) %        | 1.36 (1.17, 1.57) | 8.17x10 <sup>-05</sup> | 1.36 (1.17, 1.58) | 1.40x10 <sup>-04</sup> | 1.28 (1.08, 1.52) | 7.30x10 <sup>-03</sup> | 1.30 (1.09, 1.53) | 4.50x10 <sup>-03</sup> | 1.30 (1.09, 1.53) | 4.60x10 <sup>-03</sup> | 1.24 (1.04, 1.48) | 0.02                   |
| PL:TL in medium VLDL                                | 17.00 (0.79) %        | 0.76 (0.66, 0.88) | 2.60x10 <sup>-04</sup> | 0.75 (0.65, 0.87) | 2.00x10 <sup>-04</sup> | 0.90 (0.77, 1.06) | 0.27                   | 0.92 (0.78, 1.09) | 0.36                   | 0.92 (0.78, 1.09) | 0.37                   | 0.86 (0.72, 1.04) | 0.16                   |
| PL:TL in small HDL                                  | 46.00 (1.70) %        | 1.42 (1.20, 1.68) | 8.43x10 <sup>-05</sup> | 1.43 (1.20, 1.70) | 7.67x10 <sup>-05</sup> | 1.28 (1.05, 1.54) | 0.02                   | 1.28 (1.06, 1.54) | 0.02                   | 1.28 (1.06, 1.54) | 0.02                   | 1.20 (0.98, 1.47) | 0.10                   |
| PL:TL in small LDL                                  | 29.00 (3.70) %        | 1.29 (1.12, 1.49) | 5.80x10 <sup>-04</sup> | 1.29 (1.11, 1.49) | 1.40x10 <sup>-03</sup> | 1.22 (1.03, 1.44) | 0.03                   | 1.24 (1.05, 1.46) | 0.02                   | 1.23 (1.05, 1.46) | 0.02                   | 1.18 (1.00, 1.39) | 0.08                   |
| PL:TL in small VLDL                                 | 20.00 (0.44) %        | 0.78 (0.68, 0.89) | 2.70x10 <sup>-04</sup> | 0.77 (0.68, 0.88) | 2.60x10 <sup>-04</sup> | 0.89 (0.77, 1.04) | 0.18                   | 0.92 (0.79, 1.08) | 0.34                   | 0.92 (0.79, 1.08) | 0.35                   | 0.87 (0.73, 1.03) | 0.15                   |
| PL:TL in very large HDL                             | 55.00 (3.60) %        | 0.72 (0.59, 0.86) | 7.40x10 <sup>-04</sup> | 0.70 (0.58, 0.85) | 4.20x10 <sup>-04</sup> | 0.82 (0.67, 1.00) | 0.07                   | 0.86 (0.70, 1.05) | 0.17                   | 0.86 (0.70, 1.05) | 0.17                   | 0.84 (0.67, 1.04) | 0.16                   |
| PL:TL in very large VLDL                            | 33.00 (4.40) %        | 1.76 (1.48, 2.09) | 5.24x10 <sup>-10</sup> | 1.73 (1.45, 2.06) | 2.13x10 <sup>-09</sup> | 1.51 (1.25, 1.83) | 5.85x10 <sup>-05</sup> | 1.45 (1.20, 1.75) | 2.60x10 <sup>-04</sup> | 1.45 (1.20, 1.76) | 2.60x10 <sup>-04</sup> | 1.28 (1.06, 1.56) | 0.02                   |
| PL:TL in very small VLDL                            | 24.00 (1.30) %        | 0.85 (0.74, 0.99) | 0.04                   | 0.85 (0.74, 0.98) | 0.03                   | 0.93 (0.80, 1.08) | 0.36                   | 0.94 (0.80, 1.09) | 0.43                   | 0.94 (0.80, 1.09) | 0.44                   | 0.89 (0.75, 1.04) | 0.19                   |
| PL:TL in IDL                                        | 51.00 (6.50) %        | 0.82 (0.72, 0.94) | 6.20x10 <sup>-03</sup> | 0.83 (0.72, 0.95) | 8.80x10 <sup>-03</sup> | 0.93 (0.81, 1.07) | 0.33                   | 0.96 (0.84, 1.10) | 0.57                   | 0.96 (0.84, 1.10) | 0.57                   | 0.93 (0.78, 1.11) | 0.47                   |
| PL:TL in large HDL                                  | 14.00 (2.60) %        | 1.53 (1.33, 1.76) | 6.56x10 <sup>-09</sup> | 1.53 (1.33, 1.77) | 6.83x10 <sup>-09</sup> | 1.36 (1.16, 1.59) | 2.50x10 <sup>-04</sup> | 1.29 (1.09, 1.52) | 5.30x10 <sup>-03</sup> | 1.29 (1.09, 1.52) | 4.90x10 <sup>-03</sup> | 1.31 (1.09, 1.58) | 8.30x10 <sup>-03</sup> |
| PL:TL in large LDL                                  | 29.00 (2.50) %        | 1.30 (1.10, 1.54) | 3.50x10 <sup>-03</sup> | 1.30 (1.09, 1.55) | 5.40x10 <sup>-03</sup> | 1.24 (1.02, 1.52) | 0.05                   | 1.29 (1.05, 1.57) | 0.02                   | 1.28 (1.05, 1.57) | 0.02                   | 1.22 (1.00, 1.50) | 0.08                   |
| Polyunsaturated fatty acids                         | 3.60 (0.70) mmol/L    | 1.81 (1.55, 2.13) | 9.92x10 <sup>-13</sup> | 1.77 (1.50, 2.09) | 2.27x10 <sup>-11</sup> | 1.62 (1.36, 1.93) | 2.82x10 <sup>-07</sup> | 1.61 (1.35, 1.93) | 4.69x10 <sup>-07</sup> | 1.61 (1.35, 1.93) | 4.79x10 <sup>-07</sup> | 1.49 (1.24, 1.80) | 6.72x10 <sup>-05</sup> |
| 18:2 linoleic acid to TFA ratio                     | 26.00 (2.80) %        | 1.04 (0.92, 1.17) | 0.57                   | 1.05 (0.93, 1.20) | 0.44                   | 1.21 (1.05, 1.41) | 0.02                   | 1.23 (1.05, 1.44) | 0.01                   | 1.23 (1.06, 1.44) | 0.01                   | 1.23 (1.04, 1.45) | 0.03                   |
| 22:6 docosahexaenoic acid to TFA ratio              | 1.20 (0.33) %         | 0.52 (0.46, 0.60) | 2.09x10 <sup>-18</sup> | 0.50 (0.44, 0.58) | 3.52x10 <sup>-19</sup> | 0.46 (0.39, 0.55) | 5.47x10 <sup>-16</sup> | 0.46 (0.38, 0.55) | 1.53x10 <sup>-14</sup> | 0.46 (0.38, 0.55) | 1.48x10 <sup>-14</sup> | 0.46 (0.37, 0.58) | 1.09x10 <sup>-10</sup> |
| Apolipoprotein B:Apolipoprotein A-I                 | 0.56 (0.11)           | 1.99 (1.67, 2.38) | 1.04x10 <sup>-13</sup> | 2.03 (1.69, 2.43) | 8.51x10 <sup>-14</sup> | 1.82 (1.51, 2.21) | 2.80x10 <sup>-09</sup> | 1.79 (1.48, 2.17) | 8.68x10 <sup>-09</sup> | 1.79 (1.48, 2.17) | 8.92x10 <sup>-09</sup> | 1.95 (1.58, 2.40) | 2.29x10 <sup>-09</sup> |
| Monounsaturated fatty acids to TFA ratio            | 28.00 (2.10) %        | 1.54 (1.33, 1.79) | 2.34x10 <sup>-08</sup> | 1.56 (1.34, 1.81) | 1.97x10 <sup>-08</sup> | 1.34 (1.13, 1.58) | 1.10x10 <sup>-03</sup> | 1.30 (1.09, 1.54) | 4.70x10 <sup>-03</sup> | 1.30 (1.09, 1.54) | 4.7x10 <sup>-03</sup>  | 1.38 (1.15, 1.66) | 1.20x10 <sup>-03</sup> |
| Omega-3 fatty acids to TFA ratio                    | 3.90 (0.82) %         | 0.84 (0.73, 0.96) | 0.02                   | 0.82 (0.71, 0.95) | 0.01                   | 0.73 (0.61, 0.87) | 7.70x10 <sup>-04</sup> | 0.72 (0.60, 0.87) | 1.20x10 <sup>-03</sup> | 0.72 (0.60, 0.87) | 1.10x10 <sup>-03</sup> | 0.67 (0.53, 0.85) | 1.50x10 <sup>-03</sup> |
| Omega-6 fatty acids to TFA ratio                    | 30.00 (2.70) %        | 0.97 (0.86, 1.09) | 0.66                   | 0.98 (0.87, 1.11) | 0.78                   | 1.14 (0.99, 1.31) | 0.09                   | 1.17 (1.01, 1.36) | 0.05                   | 1.17 (1.01, 1.36) | 0.05                   | 1.13 (0.96, 1.32) | 0.19                   |
| Polyunsaturated fatty acids to TFA ratio            | 34.00 (2.60) %        | 0.93 (0.82, 1.05) | 0.24                   | 0.93 (0.82, 1.06) | 0.30                   | 1.07 (0.92, 1.23) | 0.43                   | 1.10 (0.95, 1.28) | 0.24                   | 1.10 (0.95, 1.28) | 0.24                   | 1.03 (0.88, 1.21) | 0.74                   |
| Saturated fatty acids to TFA ratio                  | 37.00 (1.60) %        | 0.61 (0.54, 0.70) | 2.93x10 <sup>-12</sup> | 0.60 (0.53, 0.69) | 2.00x10 <sup>-12</sup> | 0.62 (0.53, 0.73) | 2.00x10 <sup>-08</sup> | 0.62 (0.53, 0.73) | 2.72x10 <sup>-08</sup> | 0.62 (0.53, 0.73) | 2.42x10 <sup>-08</sup> | 0.61 (0.51, 0.73) | 3.46x10 <sup>-07</sup> |
| TG:phosphoglycerides                                | 0.68 (0.25)           | 1.94 (1.63, 2.30) | 2.75x10 <sup>-13</sup> | 2.02 (1.71, 2.39) | 1.49x10 <sup>-15</sup> | 1.73 (1.45, 2.07) | 6.13x10 <sup>-09</sup> | 1.69 (1.41, 2.03) | 3.99x10 <sup>-08</sup> | 1.69 (1.41, 2.03) | 3.77x10 <sup>-08</sup> | 1.72 (1.42, 2.08) | 9.94x10 <sup>-08</sup> |
| Remnant cholesterol (non-HDL, non-LDL -cholesterol) | 1.20 (0.32) mmol/L    | 1.24 (1.09, 1.42) | 2.40x10 <sup>-03</sup> | 1.23 (1.07, 1.41) | 5.40x10 <sup>-03</sup> | 1.12 (0.96, 1.31) | 0.19                   | 1.08 (0.93, 1.26) | 0.36                   | 1.08 (0.93, 1.26) | 0.36                   | 1.12 (0.95, 1.34) | 0.24                   |
| Saturated fatty acids                               | 3.90 (0.79) mmol/L    | 1.46 (1.26, 1.69) | 6.81x10 <sup>-07</sup> | 1.47 (1.27, 1.70) | 2.76x10 <sup>-07</sup> | 1.29 (1.11, 1.50) | 1.90x10 <sup>-03</sup> | 1.26 (1.09, 1.47) | 4.10x10 <sup>-03</sup> | 1.26 (1.09, 1.47) | 4.30x10 <sup>-03</sup> | 1.23 (1.04, 1.47) | 0.03                   |
| Serum TC                                            | 3.70 (0.73) mmol/L    | 0.81 (0.71, 0.94) | 6.20x10 <sup>-03</sup> | 0.80 (0.70, 0.93) | 4.90x10 <sup>-03</sup> | 0.78 (0.66, 0.93) | 6.70x10 <sup>-03</sup> | 0.75 (0.63, 0.89) | 1.70x10 <sup>-03</sup> | 0.75 (0.63, 0.89) | 1.70x10 <sup>-03</sup> | 0.76 (0.63, 0.91) | 5.00x10 <sup>-03</sup> |
| Serum total triglycerides                           | 1.30 (0.51) mmol/L    | 2.06 (1.74, 2.42) | 1.44x10 <sup>-16</sup> | 2.13 (1.82, 2.49) | 6.47x10 <sup>-20</sup> | 1.82 (1.54, 2.16) | 3.46x10 <sup>-11</sup> | 1.78 (1.50, 2.11) | 4.12x10 <sup>-10</sup> | 1.78 (1.50, 2.11) | 3.54x10 <sup>-10</sup> | 1.78 (1.47, 2.16) | 2.06x10 <sup>-08</sup> |
| Sphingomyelins                                      | 0.34 (0.057) mmol/L   | 1.24 (1.09, 1.41) | 1.70x10 <sup>-03</sup> | 1.22 (1.07, 1.39) | 4.50x10 <sup>-03</sup> | 1.21 (1.05, 1.39) | 0.01                   | 1.22 (1.05, 1.41) | 0.01                   | 1.22 (1.05, 1.41) | 0.01                   | 1.14 (0.98, 1.34) | 0.13                   |
| TC in chylomicrons and extremely large VLDL         | 0.0054 (0.004) mmol/L | 1.92 (1.62, 2.27) | 1.11x10 <sup>-13</sup> | 2.00 (1.70, 2.35) | 1.03x10 <sup>-16</sup> | 1.71 (1.44, 2.04) | 3.71x10 <sup>-09</sup> | 1.67 (1.40, 1.98) | 2.72x10 <sup>-08</sup> | 1.67 (1.40, 1.99) | 2.76x10 <sup>-08</sup> | 1.60 (1.32, 1.95) | 6.26x10 <sup>-06</sup> |
| TC in HDL                                           | 1.30 (0.24) mmol/L    | 0.49 (0.42, 0.59) | 4.08x10 <sup>-15</sup> | 0.48 (0.40, 0.57) | 6.43x10 <sup>-16</sup> | 0.49 (0.41, 0.60) | 4.27x10 <sup>-12</sup> | 0.48 (0.39, 0.58) | 6.24x10 <sup>-12</sup> | 0.48 (0.39, 0.58) | 6.43x10 <sup>-12</sup> | 0.44 (0.35, 0.55) | 6.28x10 <sup>-12</sup> |
| TC in HDL2                                          | 0.80 (0.22) mmol/L    | 0.50 (0.42, 0.59) | 7.82x10 <sup>-15</sup> | 0.48 (0.41, 0.57) | 1.24x10 <sup>-15</sup> | 0.50 (0.41, 0.61) | 1.24x10 <sup>-11</sup> | 0.49 (0.40, 0.60) | 2.35x10 <sup>-11</sup> | 0.49 (0.40, 0.60) | 2.50x10 <sup>-11</sup> | 0.45 (0.36, 0.56) | 2.51x10 <sup>-11</sup> |
| TC in HDL3                                          | 0.46 (0.029) mmol/L   | 0.54 (0.47, 0.62) | 1.15x10 <sup>-15</sup> | 0.53 (0.46, 0.62) | 3.80x10 <sup>-16</sup> | 0.51 (0.43, 0.61) | 2.04x10 <sup>-13</sup> | 0.48 (0.40, 0.57) | 3.81x10 <sup>-14</sup> | 0.48 (0.40, 0.57) | 3.26x10 <sup>-14</sup> | 0.43 (0.36, 0.52) | 7.31x10 <sup>-16</sup> |
| TC in IDL                                           | 0.53 (0.14) mmol/L    | 0.82 (0.70, 0.95) | 0.01                   | 0.81 (0.70, 0.95) | 0.01                   | 0.81 (0.68, 0.97) | 0.03                   | 0.79 (0.66, 0.94) | 0.01                   | 0.79 (0.66, 0.94) | 0.01                   | 0.82 (0.68, 0.99) | 0.05                   |
| TC in large HDL                                     | 0.30 (0.12) mmol/L    | 0.45 (0.37, 0.55) | 7.82x10 <sup>-15</sup> | 0.44 (0.36, 0.54) | 3.75x10 <sup>-15</sup> | 0.48 (0.39, 0.59) | 2.80x10 <sup>-11</sup> | 0.48 (0.39, 0.60) | 1.56x10 <sup>-10</sup> | 0.48 (0.39, 0.60) | 1.70x10 <sup>-10</sup> | 0.45 (0.35, 0.57) | 6.85x10 <sup>-10</sup> |
| TC in large LDL                                     | 0.66 (0.19) mmol/L    | 0.89 (0.76, 1.04) | 0.16                   | 0.89 (0.76, 1.04) | 0.16                   | 0.89 (0.75, 1.07) | 0.27                   | 0.86 (0.72, 1.03) | 0.13                   | 0.86 (0.72, 1.03) | 0.14                   | 0.90 (0.74, 1.08) | 0.30                   |
| TC in large VLDL                                    | 0.067 (0.045) mmol/L  | 1.95 (1.66, 2.29) | 3.21x10 <sup>-15</sup> | 2.02 (1.73, 2.36) | 5.25x10 <sup>-18</sup> | 1.73 (1.46, 2.04) | 9.03x10 <sup>-10</sup> | 1.69 (1.43, 2.00) | 5.41x10 <sup>-09</sup> | 1.69 (1.43, 2.01) | 5.48x10 <sup>-09</sup> | 1.66 (1.38, 2.01) | 5.54x10 <sup>-07</sup> |
| TC in LDL                                           | 1.30 (0.38) mmol/L    | 0.88 (0.76, 1.03) | 0.14                   | 0.88 (0.75, 1.03) | 0.13                   | 0.88 (0.74, 1.06) | 0.22                   | 0.85 (0.71, 1.02) | 0.11                   | 0.85 (0.71, 1.02) | 0.11                   | 0.87 (0.72, 1.05) | 0.19                   |
| TC in medium HDL                                    | 0.37 (0.071) mmol/L   | 0.82 (0.72, 0.94) | 6.80x10 <sup>-03</sup> | 0.80 (0.70, 0.92) | 2.50x10 <sup>-03</sup> | 0.78 (0.67, 0.90) | 1.90x10 <sup>-03</sup> | 0.76 (0.66, 0.89) | 1.10x10 <sup>-03</sup> | 0.76 (0.66, 0.89) | 1.10x10 <sup>-03</sup> | 0.68 (0.57, 0.82) | 9.01x10 <sup>-05</sup> |
| TC in medium LDL                                    | 0.37 (0.12) mmol/L    | 0.94 (0.81, 1.10) | 0.49                   | 0.94 (0.81, 1.09) | 0.46                   | 0.95 (0.80, 1.13) | 0.58                   | 0.91 (0.76, 1.09) | 0.35                   | 0.91 (0.76, 1.09) | 0.36                   | 0.94 (0.78, 1.12) | 0.54                   |
| TC in medium VLDL                                   | 0.16 (0.075) mmol/L   | 1.88 (1.61, 2.20) | 1.79x10 <sup>-14</sup> | 1.91 (1.63, 2.23) | 1.28x10 <sup>-15</sup> | 1.63 (1.38, 1.93) | 3.31x10 <sup>-08</sup> | 1.60 (1.36, 1.90) | 9.57x10 <sup>-08</sup> | 1.61 (1.36, 1.90) | 8.81x10 <sup>-08</sup> | 1.65 (1.37, 1.98) | 3.39x10 <sup>-07</sup> |
| TC in small HDL                                     | 0.41 (0.056) mmol/L   | 0.84 (0.72, 0.98) | 0.03                   | 0.83 (0.71, 0.97) | 0.02                   | 0.84 (0.71, 0.99) | 0.06                   | 0.81 (0.69, 0.96) | 0.02                   | 0.81 (0.69, 0.96) | 0.03                   | 0.79 (0.66, 0.95) | 0.02                   |
| TC in small LDL                                     | 0.22 (0.073) mmol/L   | 0.89 (0.77, 1.04) | 0.16                   | 0.89 (0.76, 1.04) | 0.16                   | 0.90 (0.76, 1.07) | 0.29                   | 0.87 (0.72, 1.04) | 0.15                   | 0.87 (0.72, 1.04) | 0.15                   | 0.90 (0.75, 1.07) | 0.29                   |
| TC in small VLDL                                    | 0.19 (0.064) mmol/L   | 1.19 (1.04, 1.35) | 0.01                   | 1.18 (1.03, 1.35) | 0.02                   | 1.08 (0.93, 1.25) | 0.37                   | 1.04 (0.90, 1.21) | 0.60                   | 1.04 (0.90, 1.21) | 0.61                   | 1.11 (0.94, 1.31) | 0.28                   |
| TC in very large HDL                                | 0.19 (0.079) mmol/L   | 0.47 (0.40, 0.56) | 5.72x10 <sup>-18</sup> | 0.47 (0.40, 0.56) | 1.93x10 <sup>-17</sup> | 0.48 (0.40, 0.58) | 3.31x10 <sup>-13</sup> | 0.47 (0.39, 0.57) | 1.73x10 <sup>-13</sup> | 0.47 (0.39, 0.57) | 1.43x10 <sup>-13</sup> | 0.47 (0.38, 0.58) | 7.53x10 <sup>-12</sup> |
| TC in very large VLDL                               | 0.016 (0.012) mmol/L  | 1.84 (1.56, 2.17) | 2.71x10 <sup>-12</sup> | 1.91 (1.63, 2.25) | 6.25x10 <sup>-15</sup> | 1.64 (1.38, 1.95) | 6.30x10 <sup>-08</sup> | 1.60 (1.34, 1.90) | 3.76x10 <sup>-07</sup> | 1.60 (1.34, 1.91) | 3.71x10 <sup>-07</sup> | 1.52 (1.24, 1.85) | 9.01x10 <sup>-05</sup> |
| TC in very small VLDL                               | 0.19 (0.054) mmol/L   | 0.73 (0.64, 0.84) | 2.58x10 <sup>-05</sup> | 0.73 (0.63, 0.84) | 2.01x10 <sup>-05</sup> | 0.70 (0.59, 0.83) | 6.64x10 <sup>-05</sup> | 0.67 (0.56, 0.79) | 1.24x10 <sup>-05</sup> | 0.67 (0.56, 0.79) | 1.20x10 <sup>-05</sup> | 0.71 (0.59, 0.85) | 5.00x10 <sup>-04</sup> |
| TC in VLDL                                          | 0.62 (0.22) mmol/L    | 1.49 (1.29, 1.73) | 1.01x10 <sup>-07</sup> | 1.49 (1.29, 1.72) | 1.21x10 <sup>-07</sup> | 1.30 (1.11, 1.52) | 1.70x10 <sup>-03</sup> | 1.27 (1.09, 1.48) | 4.10x10 <sup>-03</sup> | 1.27 (1.09, 1.48) | 4.30x10 <sup>-3</sup>  | 1.32 (1.11, 1.57) | 3.10x10 <sup>-03</sup> |
| TC:TL in chylomicrons and extremely large VLDL      | 16.00 (4.50) %        | 0.92 (0.82, 1.03) | 0.17                   | 0.92 (0.82, 1.04) | 0.22                   | 0.92 (0.80, 1.07) | 0.33                   | 0.94 (0.80, 1.09) | 0.43                   | 0.94 (0.80, 1.09) | 0.43                   | 0.97 (0.82, 1.15) | 0.78                   |
| TC:TL in IDL                                        | 61.00 (2.90) %        | 0.68 (0.57, 0.81) | 3.15x10 <sup>-05</sup> | 0.67 (0.56, 0.80) | 1.37x10 <sup>-05</sup> | 0.69              |                        |                   |                        |                   |                        |                   |                        |

| Metabolic biomarker                            | Mean (SD)             | Model A           |                        | Model B           |                        | Model C1          |                        | Model C2          |                        | Model C3          |                        | Model D           |                        |
|------------------------------------------------|-----------------------|-------------------|------------------------|-------------------|------------------------|-------------------|------------------------|-------------------|------------------------|-------------------|------------------------|-------------------|------------------------|
|                                                |                       | HR* (95% CI)      | p-value†               | HR* (95% CI)      | p-value†               | HR* (95% CI)      | p-value†               | HR* (95% CI)      | p-value†               | HR* (95% CI)      | p-value†               | HR* (95% CI)      | p-value†               |
| TC:TL in small LDL                             | 59.00 (6.20) %        | 0.72 (0.62, 0.83) | 1.38×10 <sup>-05</sup> | 0.72 (0.62, 0.83) | 1.95×10 <sup>-05</sup> | 0.77 (0.65, 0.90) | 2.40×10 <sup>-03</sup> | 0.76 (0.64, 0.89) | 1.50×10 <sup>-03</sup> | 0.76 (0.64, 0.89) | 1.60×10 <sup>-03</sup> | 0.79 (0.67, 0.94) | 0.01                   |
| TC:TL in small VLDL                            | 33.00 (5.60) %        | 0.58 (0.50, 0.67) | 7.86×10 <sup>-12</sup> | 0.56 (0.48, 0.65) | 1.37×10 <sup>-12</sup> | 0.58 (0.48, 0.69) | 6.87×10 <sup>-09</sup> | 0.57 (0.47, 0.68) | 6.74×10 <sup>-09</sup> | 0.56 (0.47, 0.68) | 5.82×10 <sup>-09</sup> | 0.57 (0.47, 0.69) | 2.93×10 <sup>-08</sup> |
| TC:TL in very large HDL                        | 45.00 (5.60) %        | 0.91 (0.77, 1.07) | 0.28                   | 0.91 (0.77, 1.08) | 0.31                   | 0.84 (0.71, 1.00) | 0.07                   | 0.80 (0.67, 0.96) | 0.02                   | 0.80 (0.67, 0.96) | 0.02                   | 0.83 (0.68, 1.01) | 0.09                   |
| TC:TL in very large VLDL                       | 20.00 (3.80) %        | 0.84 (0.73, 0.96) | 0.02                   | 0.83 (0.72, 0.96) | 0.02                   | 0.90 (0.76, 1.06) | 0.26                   | 0.93 (0.79, 1.11) | 0.46                   | 0.93 (0.79, 1.11) | 0.46                   | 0.95 (0.81, 1.12) | 0.61                   |
| TC:TL in very small VLDL                       | 46.00 (4.80) %        | 0.52 (0.41, 0.65) | 1.53×10 <sup>-08</sup> | 0.48 (0.40, 0.57) | 8.19×10 <sup>-16</sup> | 0.50 (0.41, 0.60) | 1.08×10 <sup>-11</sup> | 0.49 (0.40, 0.59) | 6.16×10 <sup>-12</sup> | 0.49 (0.40, 0.59) | 4.24×10 <sup>-12</sup> | 0.50 (0.41, 0.61) | 9.51×10 <sup>-11</sup> |
| Total cholines                                 | 2.00 (0.26) mmol/L    | 1.09 (0.96, 1.25) | 0.21                   | 1.08 (0.94, 1.24) | 0.31                   | 1.05 (0.90, 1.23) | 0.54                   | 1.05 (0.90, 1.22) | 0.59                   | 1.05 (0.90, 1.22) | 0.59                   | 0.97 (0.81, 1.15) | 0.74                   |
| Total fatty acids                              | 10.00 (2.10) mmol/L   | 1.69 (1.44, 1.97) | 1.96×10 <sup>-10</sup> | 1.68 (1.44, 1.97) | 1.02×10 <sup>-10</sup> | 1.47 (1.25, 1.74) | 1.06×10 <sup>-05</sup> | 1.45 (1.23, 1.71) | 1.84×10 <sup>-05</sup> | 1.45 (1.23, 1.71) | 1.82×10 <sup>-05</sup> | 1.41 (1.18, 1.69) | 4.10×10 <sup>-04</sup> |
| TL in chylomicrons and extremely large VLDL    | 0.032 (0.023) mmol/L  | 2.05 (1.72, 2.43) | 2.73×10 <sup>-15</sup> | 2.18 (1.85, 2.56) | 1.26×10 <sup>-19</sup> | 1.87 (1.56, 2.22) | 3.13×10 <sup>-11</sup> | 1.80 (1.51, 2.16) | 5.99×10 <sup>-10</sup> | 1.81 (1.51, 2.16) | 6.09×10 <sup>-10</sup> | 1.68 (1.37, 2.05) | 1.34×10 <sup>-06</sup> |
| TL in IDL                                      | 0.87 (0.21) mmol/L    | 0.90 (0.77, 1.04) | 0.18                   | 0.89 (0.76, 1.04) | 0.16                   | 0.89 (0.75, 1.06) | 0.26                   | 0.87 (0.73, 1.03) | 0.14                   | 0.87 (0.73, 1.03) | 0.14                   | 0.90 (0.75, 1.09) | 0.33                   |
| TL in large HDL                                | 0.65 (0.23) mmol/L    | 0.47 (0.39, 0.57) | 5.13×10 <sup>-14</sup> | 0.46 (0.38, 0.56) | 2.21×10 <sup>-14</sup> | 0.50 (0.41, 0.61) | 5.38×10 <sup>-11</sup> | 0.49 (0.40, 0.61) | 2.69×10 <sup>-10</sup> | 0.49 (0.40, 0.61) | 2.86×10 <sup>-10</sup> | 0.46 (0.36, 0.58) | 6.85×10 <sup>-10</sup> |
| TL in large LDL                                | 1.00 (0.25) mmol/L    | 0.95 (0.82, 1.11) | 0.54                   | 0.94 (0.81, 1.10) | 0.49                   | 0.95 (0.79, 1.13) | 0.57                   | 0.91 (0.76, 1.09) | 0.35                   | 0.91 (0.76, 1.09) | 0.35                   | 0.94 (0.79, 1.14) | 0.60                   |
| TL in large VLDL                               | 0.30 (0.19) mmol/L    | 1.97 (1.67, 2.31) | 1.66×10 <sup>-15</sup> | 2.05 (1.76, 2.39) | 5.73×10 <sup>-19</sup> | 1.75 (1.48, 2.07) | 3.45×10 <sup>-10</sup> | 1.70 (1.44, 2.02) | 3.65×10 <sup>-09</sup> | 1.71 (1.44, 2.02) | 3.67×10 <sup>-09</sup> | 1.65 (1.36, 1.99) | 1.07×10 <sup>-06</sup> |
| TL in medium HDL                               | 0.77 (0.13) mmol/L    | 0.98 (0.86, 1.12) | 0.77                   | 0.95 (0.83, 1.09) | 0.50                   | 0.89 (0.76, 1.03) | 0.16                   | 0.87 (0.75, 1.02) | 0.10                   | 0.87 (0.75, 1.02) | 0.10                   | 0.78 (0.66, 0.93) | 0.01                   |
| TL in medium LDL                               | 0.57 (0.15) mmol/L    | 1.05 (0.91, 1.21) | 0.54                   | 1.04 (0.90, 1.21) | 0.61                   | 1.04 (0.88, 1.23) | 0.68                   | 1.00 (0.84, 1.19) | 0.99                   | 1.00 (0.84, 1.19) | 1.00                   | 1.02 (0.85, 1.21) | 0.87                   |
| TL in medium VLDL                              | 0.60 (0.29) mmol/L    | 2.00 (1.70, 2.34) | 2.40×10 <sup>-16</sup> | 2.06 (1.76, 2.40) | 5.17×10 <sup>-19</sup> | 1.74 (1.47, 2.06) | 4.20×10 <sup>-10</sup> | 1.70 (1.44, 2.02) | 3.82×10 <sup>-09</sup> | 1.71 (1.44, 2.02) | 3.67×10 <sup>-09</sup> | 1.71 (1.42, 2.07) | 7.97×10 <sup>-08</sup> |
| TL in small HDL                                | 1.00 (0.094) mmol/L   | 1.40 (1.23, 1.59) | 4.06×10 <sup>-07</sup> | 1.38 (1.22, 1.57) | 1.29×10 <sup>-06</sup> | 1.23 (1.07, 1.41) | 4.40×10 <sup>-03</sup> | 1.18 (1.02, 1.36) | 0.03                   | 1.18 (1.02, 1.36) | 0.01                   | 1.08 (0.92, 1.27) | 0.40                   |
| TL in small LDL                                | 0.37 (0.094) mmol/L   | 1.03 (0.89, 1.19) | 0.69                   | 1.02 (0.88, 1.18) | 0.78                   | 1.01 (0.85, 1.20) | 0.91                   | 0.97 (0.81, 1.15) | 0.73                   | 0.97 (0.81, 1.15) | 0.74                   | 0.98 (0.83, 1.17) | 0.87                   |
| TL in small VLDL                               | 0.56 (0.18) mmol/L    | 1.74 (1.48, 2.05) | 4.45×10 <sup>-11</sup> | 1.75 (1.50, 2.05) | 4.58×10 <sup>-12</sup> | 1.53 (1.30, 1.81) | 1.33×10 <sup>-06</sup> | 1.51 (1.28, 1.78) | 2.34×10 <sup>-06</sup> | 1.51 (1.28, 1.78) | 2.24×10 <sup>-06</sup> | 1.56 (1.30, 1.88) | 4.00×10 <sup>-06</sup> |
| TL in very large HDL                           | 0.41 (0.16) mmol/L    | 0.44 (0.37, 0.53) | 1.40×10 <sup>-17</sup> | 0.44 (0.37, 0.53) | 1.95×10 <sup>-17</sup> | 0.46 (0.38, 0.56) | 5.77×10 <sup>-13</sup> | 0.45 (0.37, 0.55) | 8.25×10 <sup>-13</sup> | 0.45 (0.37, 0.55) | 7.38×10 <sup>-13</sup> | 0.45 (0.36, 0.56) | 2.75×10 <sup>-11</sup> |
| TL in very large VLDL                          | 0.079 (0.058) mmol/L  | 1.91 (1.62, 2.26) | 1.15×10 <sup>-13</sup> | 2.01 (1.72, 2.36) | 3.07×10 <sup>-17</sup> | 1.71 (1.44, 2.04) | 4.27×10 <sup>-09</sup> | 1.66 (1.39, 1.98) | 4.45×10 <sup>-08</sup> | 1.67 (1.40, 1.99) | 4.39×10 <sup>-08</sup> | 1.56 (1.27, 1.90) | 4.07×10 <sup>-05</sup> |
| TL in very small VLDL                          | 0.42 (0.098) mmol/L   | 1.04 (0.91, 1.20) | 0.56                   | 1.03 (0.90, 1.19) | 0.66                   | 0.98 (0.83, 1.14) | 0.78                   | 0.94 (0.80, 1.10) | 0.47                   | 0.94 (0.80, 1.10) | 0.47                   | 1.00 (0.83, 1.20) | 0.99                   |
| Total phosphoglycerides                        | 1.80 (0.27) mmol/L    | 1.08 (0.95, 1.23) | 0.26                   | 1.06 (0.93, 1.21) | 0.41                   | 1.00 (0.86, 1.16) | 0.99                   | 0.98 (0.84, 1.14) | 0.80                   | 0.98 (0.84, 1.14) | 0.80                   | 0.92 (0.77, 1.09) | 0.40                   |
| TG in chylomicrons and extremely large VLDL    | 0.023 (0.016) mmol/L  | 2.07 (1.74, 2.46) | 1.58×10 <sup>-15</sup> | 2.22 (1.88, 2.61) | 6.16×10 <sup>-20</sup> | 1.90 (1.59, 2.27) | 1.29×10 <sup>-11</sup> | 1.84 (1.53, 2.20) | 2.65×10 <sup>-10</sup> | 1.84 (1.54, 2.20) | 2.63×10 <sup>-10</sup> | 1.70 (1.39, 2.07) | 9.09×10 <sup>-07</sup> |
| TG in HDL                                      | 0.13 (0.034) mmol/L   | 2.12 (1.79, 2.52) | 1.48×10 <sup>-16</sup> | 2.14 (1.82, 2.53) | 9.14×10 <sup>-19</sup> | 1.88 (1.57, 2.25) | 2.93×10 <sup>-11</sup> | 1.86 (1.56, 2.23) | 1.00×10 <sup>-10</sup> | 1.87 (1.56, 2.23) | 8.47×10 <sup>-11</sup> | 1.89 (1.53, 2.32) | 9.99×10 <sup>-09</sup> |
| TG in IDL                                      | 0.095 (0.023) mmol/L  | 1.53 (1.30, 1.79) | 5.78×10 <sup>-07</sup> | 1.54 (1.31, 1.81) | 2.32×10 <sup>-07</sup> | 1.45 (1.22, 1.71) | 3.08×10 <sup>-05</sup> | 1.43 (1.21, 1.70) | 6.53×10 <sup>-05</sup> | 1.43 (1.21, 1.70) | 6.65×10 <sup>-05</sup> | 1.65 (1.40, 1.95) | 1.02×10 <sup>-08</sup> |
| TG in large HDL                                | 0.025 (0.011) mmol/L  | 1.17 (1.02, 1.35) | 0.04                   | 1.17 (1.01, 1.35) | 0.04                   | 1.21 (1.03, 1.43) | 0.03                   | 1.27 (1.08, 1.51) | 7.40×10 <sup>-03</sup> | 1.27 (1.08, 1.51) | 7.80×10 <sup>-03</sup> | 1.23 (1.00, 1.52) | 0.01                   |
| TG in large LDL                                | 0.078 (0.02) mmol/L   | 1.42 (1.22, 1.65) | 1.20×10 <sup>-05</sup> | 1.42 (1.22, 1.65) | 6.82×10 <sup>-06</sup> | 1.35 (1.15, 1.58) | 4.60×10 <sup>-04</sup> | 1.34 (1.14, 1.58) | 8.70×10 <sup>-04</sup> | 1.34 (1.14, 1.57) | 8.80×10 <sup>-04</sup> | 1.50 (1.27, 1.77) | 4.58×10 <sup>-06</sup> |
| TG in large VLDL                               | 0.18 (0.11) mmol/L    | 1.97 (1.67, 2.31) | 1.81×10 <sup>-15</sup> | 2.05 (1.76, 2.39) | 4.57×10 <sup>-19</sup> | 1.75 (1.48, 2.07) | 3.45×10 <sup>-10</sup> | 1.70 (1.44, 2.02) | 4.04×10 <sup>-09</sup> | 1.70 (1.44, 2.02) | 4.10×10 <sup>-09</sup> | 1.63 (1.35, 1.98) | 1.58×10 <sup>-06</sup> |
| TG in LDL                                      | 0.14 (0.036) mmol/L   | 1.48 (1.26, 1.73) | 1.72×10 <sup>-06</sup> | 1.48 (1.27, 1.72) | 8.28×10 <sup>-07</sup> | 1.39 (1.19, 1.64) | 1.20×10 <sup>-04</sup> | 1.38 (1.17, 1.63) | 2.60×10 <sup>-04</sup> | 1.38 (1.17, 1.63) | 2.60×10 <sup>-04</sup> | 1.53 (1.30, 1.81) | 1.76×10 <sup>-06</sup> |
| TG in medium HDL                               | 0.046 (0.012) mmol/L  | 2.27 (1.89, 2.73) | 1.78×10 <sup>-17</sup> | 2.31 (1.95, 2.74) | 4.92×10 <sup>-20</sup> | 2.02 (1.69, 2.42) | 4.76×10 <sup>-13</sup> | 2.01 (1.68, 2.41) | 9.52×10 <sup>-13</sup> | 2.02 (1.68, 2.43) | 7.38×10 <sup>-13</sup> | 2.04 (1.67, 2.49) | 3.66×10 <sup>-11</sup> |
| TG in medium LDL                               | 0.039 (0.0097) mmol/L | 1.44 (1.24, 1.68) | 5.71×10 <sup>-06</sup> | 1.44 (1.24, 1.68) | 3.16×10 <sup>-06</sup> | 1.37 (1.17, 1.61) | 2.10×10 <sup>-04</sup> | 1.36 (1.15, 1.60) | 4.60×10 <sup>-04</sup> | 1.36 (1.15, 1.60) | 4.60×10 <sup>-04</sup> | 1.52 (1.29, 1.78) | 1.51×10 <sup>-06</sup> |
| TG in medium VLDL                              | 0.32 (0.16) mmol/L    | 2.02 (1.72, 2.38) | 1.94×10 <sup>-16</sup> | 2.10 (1.80, 2.45) | 1.03×10 <sup>-19</sup> | 1.78 (1.50, 2.11) | 1.28×10 <sup>-10</sup> | 1.73 (1.46, 2.06) | 1.71×10 <sup>-09</sup> | 1.74 (1.46, 2.06) | 1.61×10 <sup>-09</sup> | 1.72 (1.43, 2.08) | 7.97×10 <sup>-08</sup> |
| TG in small HDL                                | 0.05 (0.013) mmol/L   | 2.59 (2.14, 3.12) | 2.71×10 <sup>-21</sup> | 2.71 (2.26, 3.24) | 1.78×10 <sup>-25</sup> | 2.40 (1.99, 2.90) | 1.44×10 <sup>-17</sup> | 2.35 (1.94, 2.85) | 5.64×10 <sup>-16</sup> | 2.36 (1.94, 2.86) | 5.79×10 <sup>-16</sup> | 2.50 (2.03, 3.09) | 7.31×10 <sup>-16</sup> |
| TG in small LDL                                | 0.026 (0.0074) mmol/L | 1.73 (1.47, 2.04) | 1.45×10 <sup>-10</sup> | 1.75 (1.49, 2.05) | 2.26×10 <sup>-11</sup> | 1.57 (1.32, 1.85) | 4.61×10 <sup>-07</sup> | 1.54 (1.30, 1.82) | 1.48×10 <sup>-06</sup> | 1.54 (1.30, 1.82) | 1.50×10 <sup>-06</sup> | 1.61 (1.34, 1.93) | 1.21×10 <sup>-06</sup> |
| TG in small VLDL                               | 0.24 (0.092) mmol/L   | 2.13 (1.80, 2.53) | 3.93×10 <sup>-17</sup> | 2.19 (1.86, 2.58) | 1.38×10 <sup>-19</sup> | 1.88 (1.57, 2.24) | 2.98×10 <sup>-11</sup> | 1.85 (1.55, 2.21) | 1.34×10 <sup>-10</sup> | 1.86 (1.55, 2.22) | 1.05×10 <sup>-10</sup> | 1.88 (1.55, 2.28) | 1.63×10 <sup>-09</sup> |
| TG in very large HDL                           | 0.015 (0.0068) mmol/L | 1.29 (1.11, 1.50) | 1.70×10 <sup>-03</sup> | 1.28 (1.10, 1.50) | 2.00×10 <sup>-03</sup> | 1.17 (0.99, 1.38) | 0.09                   | 1.17 (0.99, 1.38) | 0.08                   | 1.17 (0.99, 1.38) | 0.09                   | 1.15 (0.95, 1.41) | 0.20                   |
| TG in very large VLDL                          | 0.051 (0.037) mmol/L  | 1.94 (1.64, 2.29) | 5.50×10 <sup>-14</sup> | 2.04 (1.74, 2.39) | 8.95×10 <sup>-18</sup> | 1.74 (1.46, 2.07) | 2.06×10 <sup>-09</sup> | 1.68 (1.41, 2.01) | 2.72×10 <sup>-08</sup> | 1.69 (1.41, 2.01) | 2.65×10 <sup>-08</sup> | 1.57 (1.28, 1.92) | 3.45×10 <sup>-05</sup> |
| TG in very small VLDL                          | 0.10 (0.028) mmol/L   | 1.82 (1.53, 2.16) | 2.04×10 <sup>-11</sup> | 1.86 (1.58, 2.19) | 4.67×10 <sup>-13</sup> | 1.67 (1.40, 1.98) | 1.81×10 <sup>-08</sup> | 1.65 (1.39, 1.97) | 4.35×10 <sup>-08</sup> | 1.65 (1.39, 1.97) | 3.94×10 <sup>-08</sup> | 1.78 (1.48, 2.15) | 1.08×10 <sup>-08</sup> |
| TG in VLDL                                     | 0.90 (0.44) mmol/L    | 2.04 (1.73, 2.40) | 1.51×10 <sup>-16</sup> | 2.12 (1.82, 2.48) | 6.47×10 <sup>-20</sup> | 1.80 (1.52, 2.14) | 5.99×10 <sup>-11</sup> | 1.76 (1.48, 2.08) | 8.53×10 <sup>-10</sup> | 1.76 (1.48, 2.09) | 7.72×10 <sup>-10</sup> | 1.74 (1.44, 2.11) | 5.46×10 <sup>-08</sup> |
| TG:TL in chylomicrons and extremely large VLDL | 73.00 (5.40) %        | 0.89 (0.80, 1.00) | 0.05                   | 0.89 (0.79, 1.00) | 0.05                   | 0.92 (0.81, 1.06) | 0.29                   | 0.93 (0.80, 1.07) | 0.35                   | 0.93 (0.80, 1.07) | 0.35                   | 0.92 (0.78, 1.08) | 0.34                   |
| TG:TL in IDL                                   | 11.00 (2.80) %        | 1.81 (1.52, 2.16) | 1.44×10 <sup>-10</sup> | 1.88 (1.58, 2.23) | 4.02×10 <sup>-12</sup> | 1.73 (1.43, 2.10) | 4.80×10 <sup>-08</sup> | 1.77 (1.46, 2.13) | 1.49×10 <sup>-08</sup> | 1.77 (1.47, 2.14) | 1.10×10 <sup>-08</sup> | 1.76 (1.44, 2.14) | 1.11×10 <sup>-07</sup> |
| TG:TL in large HDL                             | 4.10 (1.70) %         | 2.18 (1.76, 2.71) | 5.58×10 <sup>-12</sup> | 2.24 (1.81, 2.76) | 2.93×10 <sup>-13</sup> | 2.07 (1.68, 2.56) | 5.70×10 <sup>-11</sup> | 2.07 (1.67, 2.55) | 1.34×10 <sup>-10</sup> | 2.07 (1.67, 2.56) | 1.41×10 <sup>-10</sup> | 2.12 (1.69, 2.65) | 4.14×10 <sup>-10</sup> |
| TG:TL in large LDL                             | 8.10 (2.00) %         | 1.62 (1.37, 1.92) | 3.92×10 <sup>-08</sup> | 1.63 (1.38, 1.93) | 3.82×10 <sup>-08</sup> | 1.52 (1.26, 1.82) | 2.21×10 <sup>-05</sup> | 1.55 (1.29, 1.86) | 8.09×10 <sup>-06</sup> | 1.55 (1.29, 1.86) | 7.87×10 <sup>-06</sup> | 1.52 (1.25, 1.85) | 6.72×10 <sup>-05</sup> |
| TG:TL in large VLDL                            | 60.00 (2.80) %        | 0.74 (0.63, 0.87) | 2.80×10 <sup>-04</sup> | 0.75 (0.64, 0.88) | 5.40×10 <sup>-04</sup> | 0.74 (0.61, 0.90) | 4.00×10 <sup>-03</sup> | 0.74 (0.61, 0.90) | 4.70×10 <sup>-03</sup> | 0.74 (0.61, 0.90) | 4.70×10 <sup>-03</sup> | 0.72 (0.58, 0.91) | 8.30×10 <sup>-03</sup> |
| TG:TL in medium HDL                            | 6.00 (1.70) %         | 2.02 (1.69, 2.41) | 2.38×10 <sup>-14</sup> | 2.07 (1.73, 2.46) | 1.49×10 <sup>-15</sup> | 1.88 (1.56, 2.27) | 2.99×10 <sup>-10</sup> | 1.87 (1.54, 2.27) | 1.05×10 <sup>-09</sup> | 1.88 (1.55, 2.28) | 9.92×10 <sup>-10</sup> | 2.22 (1.84, 2.68) | 4.61×10 <sup>-15</sup> |
| TG:TL in medium LDL                            | 7.10 (1.90) %         | 1.37 (1.19, 1.58) | 2.74×10 <sup>-05</sup> | 1.37 (1.18,       |                        |                   |                        |                   |                        |                   |                        |                   |                        |



**Supplementary Table S2. Chinese population type 2 diabetes risk prediction models**

| Study                                            | No. of participants                      | No. of diabetes cases                  | Type 2 diabetes definition                                                                                         | Follow-up period | Variables included                                                                       | AUC   |
|--------------------------------------------------|------------------------------------------|----------------------------------------|--------------------------------------------------------------------------------------------------------------------|------------------|------------------------------------------------------------------------------------------|-------|
| Chin-Shan Community Cardiovascular Cohort Study* | 2,960                                    | 548                                    | FPG $\geq 7.0$ mmol/L, oral hypoglycaemic med or insulin use                                                       | 10 y             | Age, FPG, BMI, TG, WBC, HDL-C                                                            | 0.702 |
| Chinese Diabetes Risk Score†                     | Derivation: 1,457<br>Validation: 394     | Derivation: 304<br>Validation: 48      | Self-reported diagnosis, use of hypoglycaemic meds, FPG $\geq 7.0$ mmol/L, 2h post-load glucose $\geq 11.1$ mmol/L | 10 y             | Age, HTN, history of elevated blood glucose, BMI, FPG, TG, HDL-C                         | 0.722 |
| Guangzhou Biobank Cohort‡                        | Derivation: 8,000<br>Validation: 8,043   | 836                                    | Self-reported physician diagnosis, hypoglycemic meds or insulin, FPG $\geq 7.0$ mmol/L                             | 4.1 y            | BMI, BP, antihypertensive medication use, HTN, HDL-C, TG, FPG                            | 0.779 |
| Kailuan§                                         | Derivation: 49,325<br>Validation: 24,662 | Derivation: 4,726<br>Validation: 2,327 | Self-reported diabetes diagnosis, taking anti-diabetic meds, FPG $\geq 7.0$ mmol/L                                 | 5 y              | Age, sex, BMI, FH of diabetes, education, BP, HR, FPG, TG, lipid-lowering medication use | 0.77  |

\*Diabetologia 2009;52:443–450

†Diab Tech Ther 2011;13(5):501-507

‡Prev Med 2014;69:63–68

§Sci Rep 2016;6:26548

AUC=area under the curve; BMI=body mass index; BP=blood pressure; FH= family history; FPG=fasting plasma glucose; HDL-C=HDL-cholesterol; HR=heart rate; HTN=hypertension; TG=triglycerides; WBC=white blood cell count

**Supplementary Figure S1. Correlation between directly-measured metabolic biomarkers within subcohort participants (n=789)**  
Adjusted for age, sex and study area

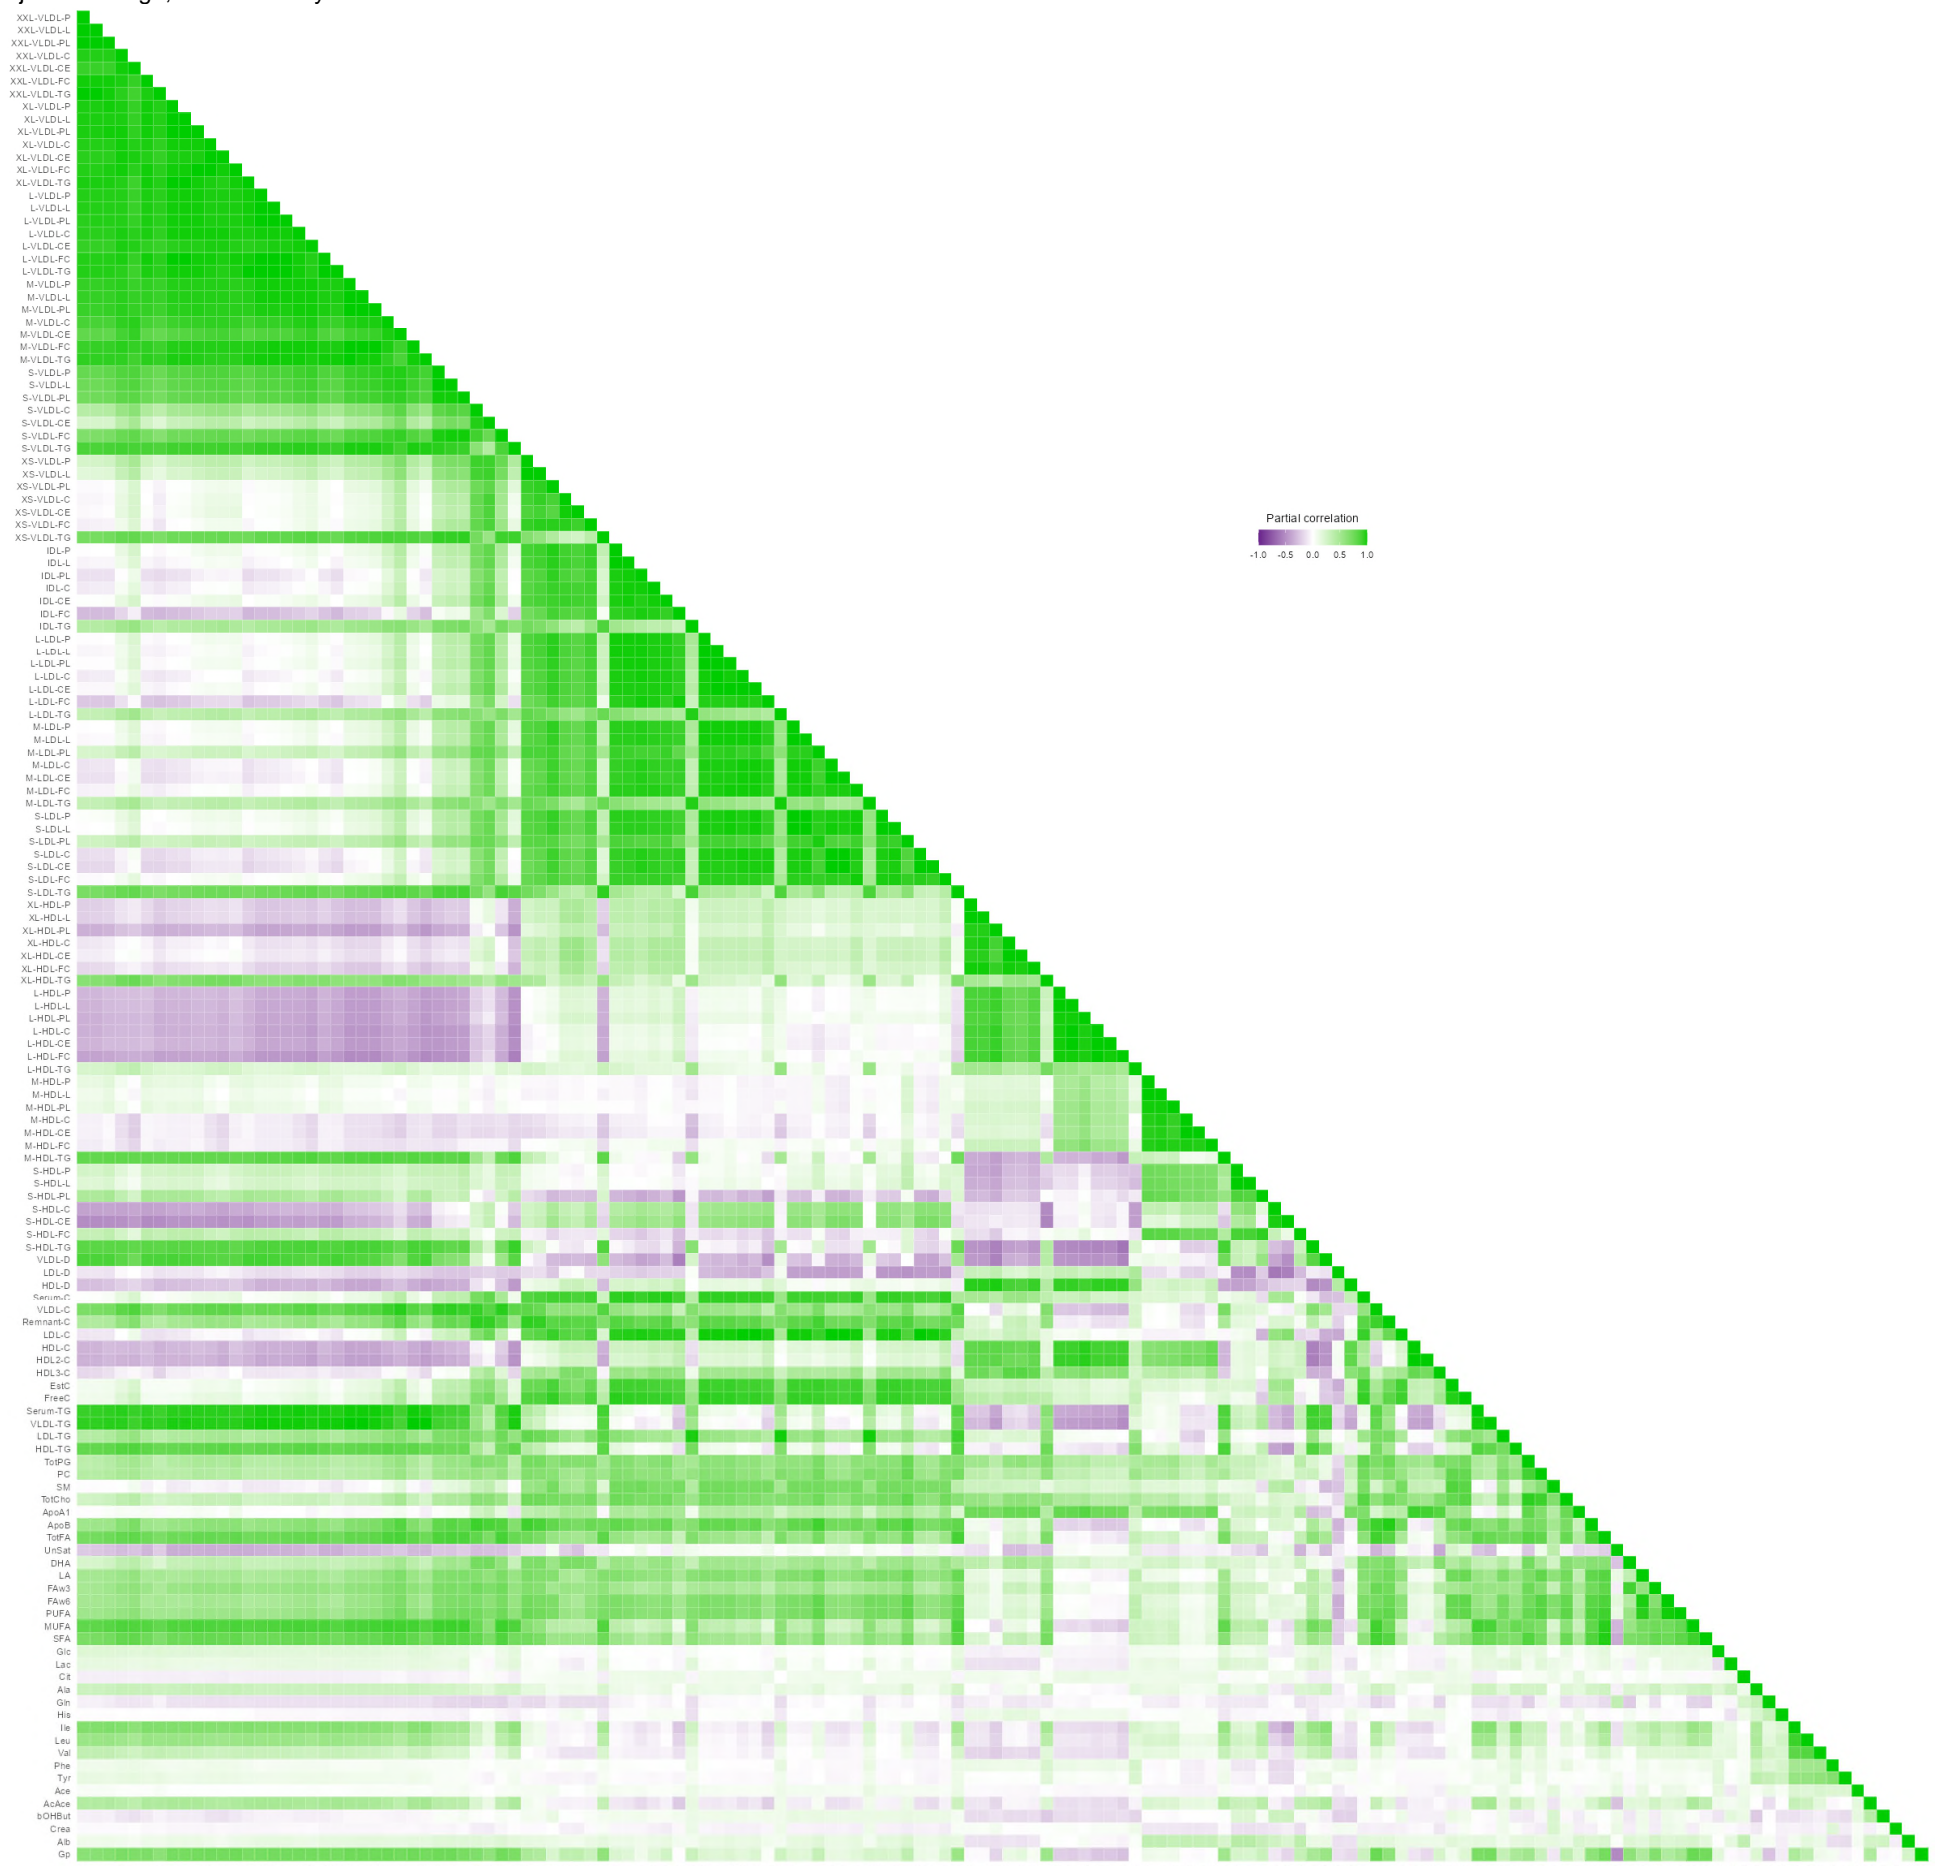

## Supplementary Figure S2. Associations of directly-measured metabolic biomarkers with incident type 2 diabetes

Adjusted for age, sex, study area, education, fasting time

Dashed line:  $p=0.05$ ; Solid line: Bonferroni corrected significance threshold

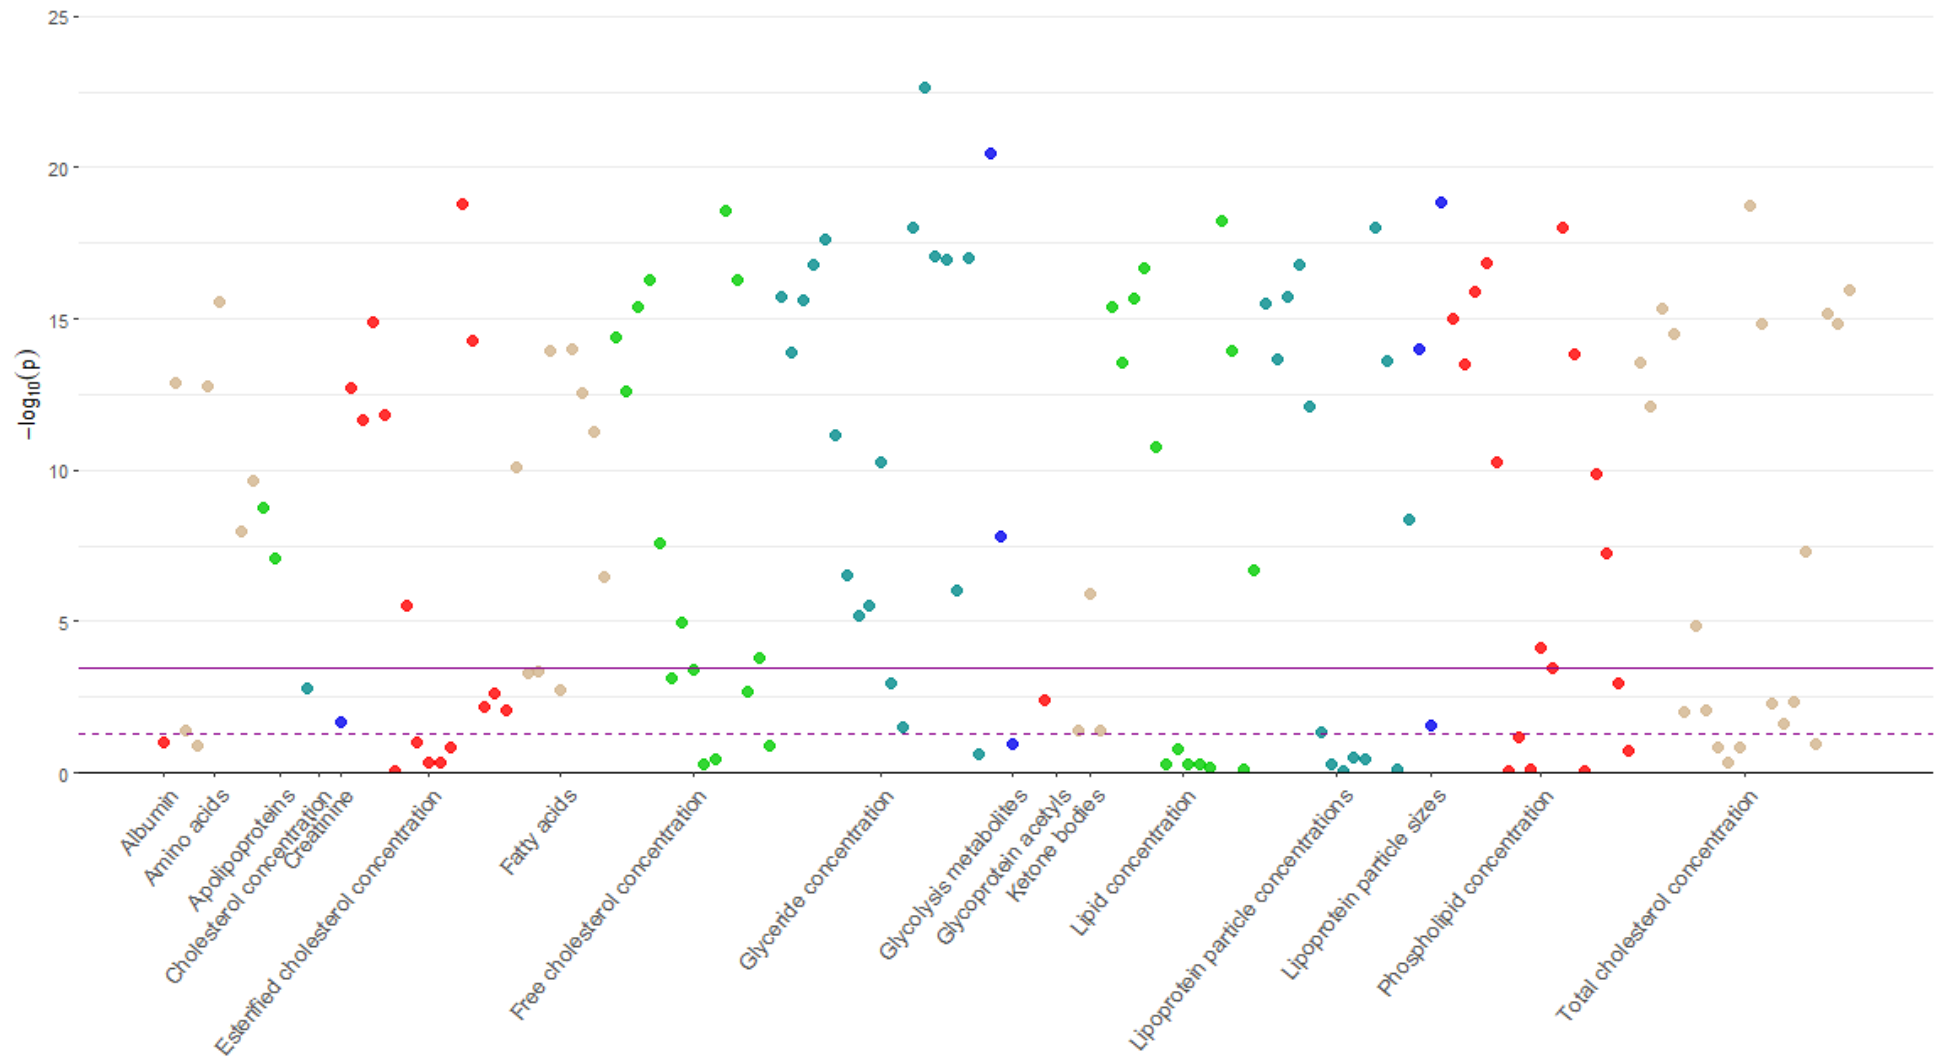

### Supplementary Figure S3. Associations of metabolic biomarkers with incident type 2 diabetes

Adjusted for age, sex, region, education and fasting time

#### A. Lipids, apolipoproteins and lipoprotein particle concentrations

#### B.

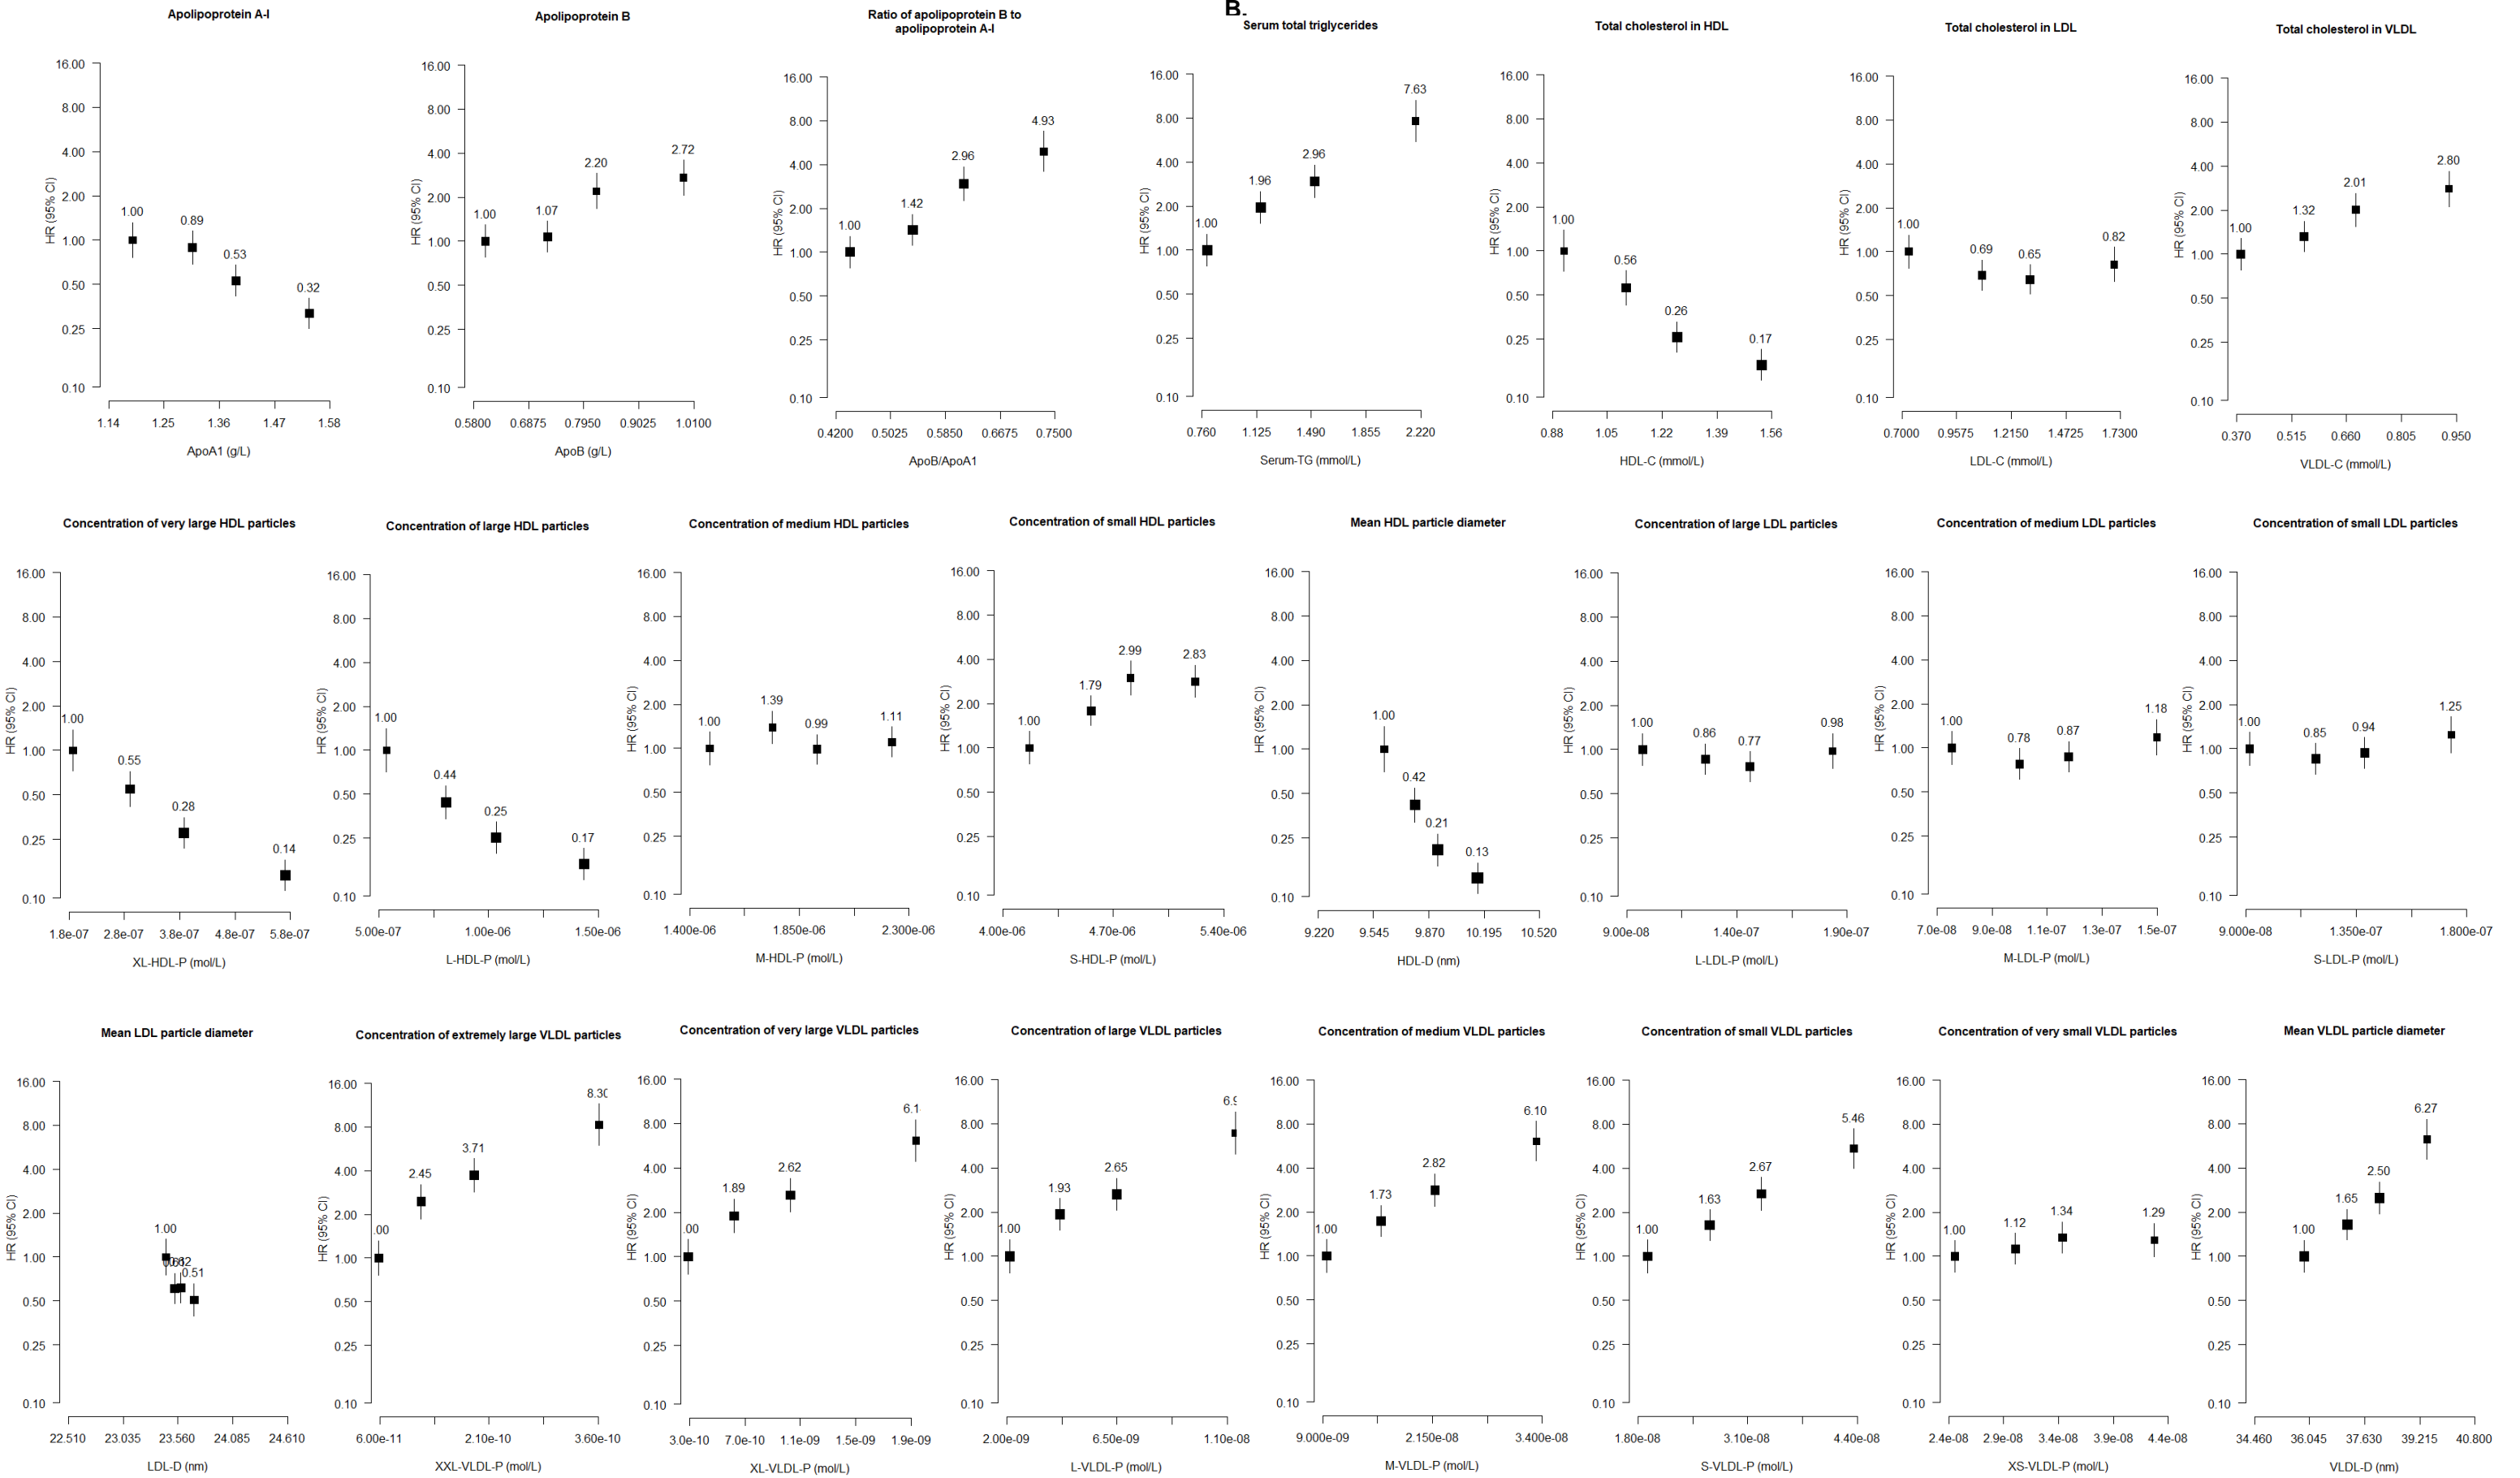

### C. Fatty acids

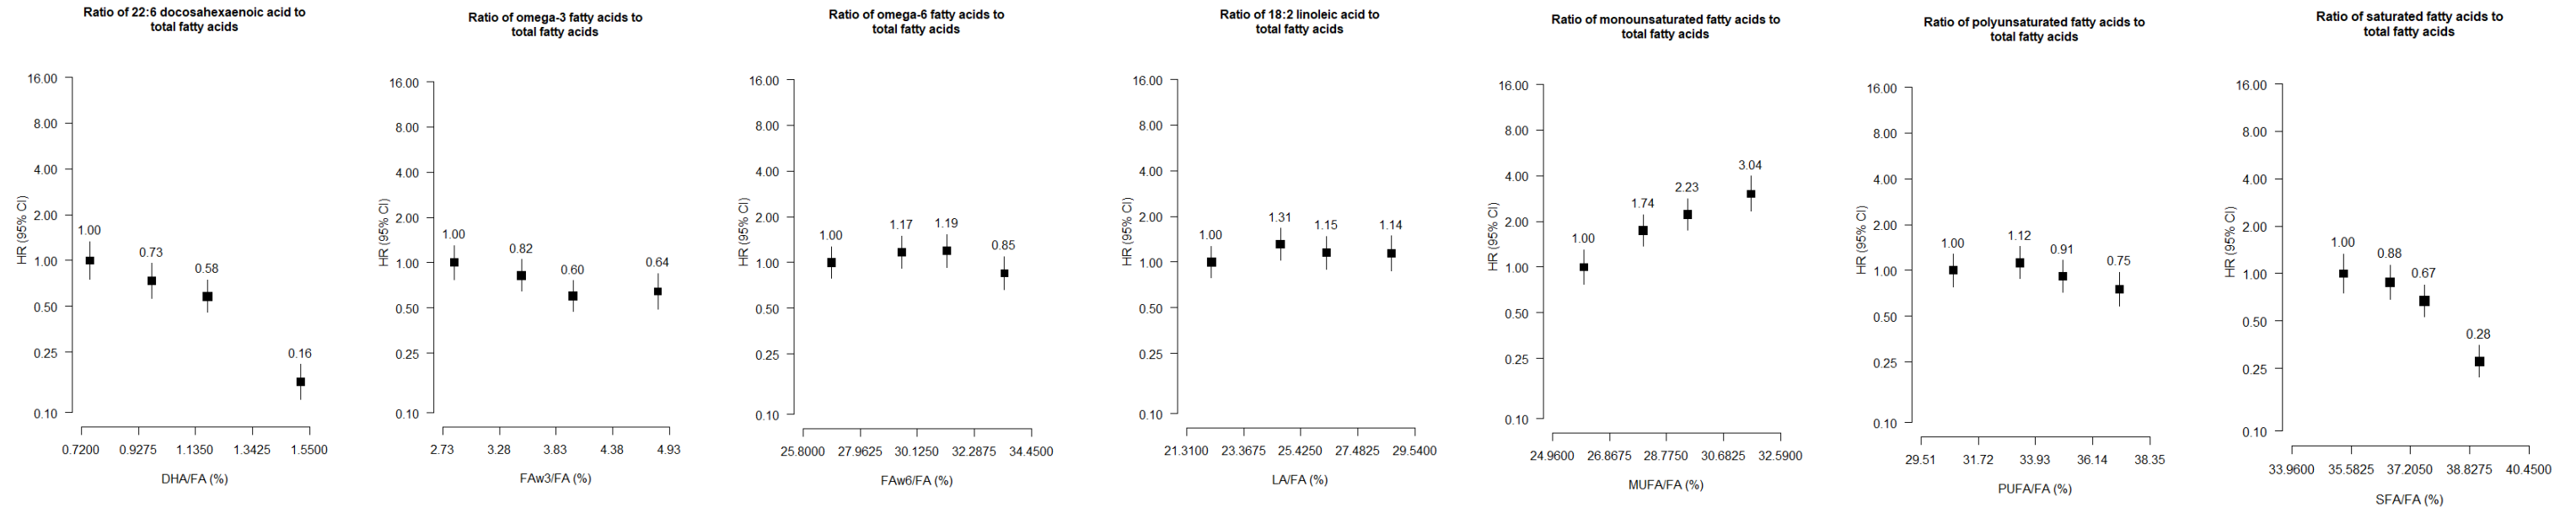

### D. Amino acids

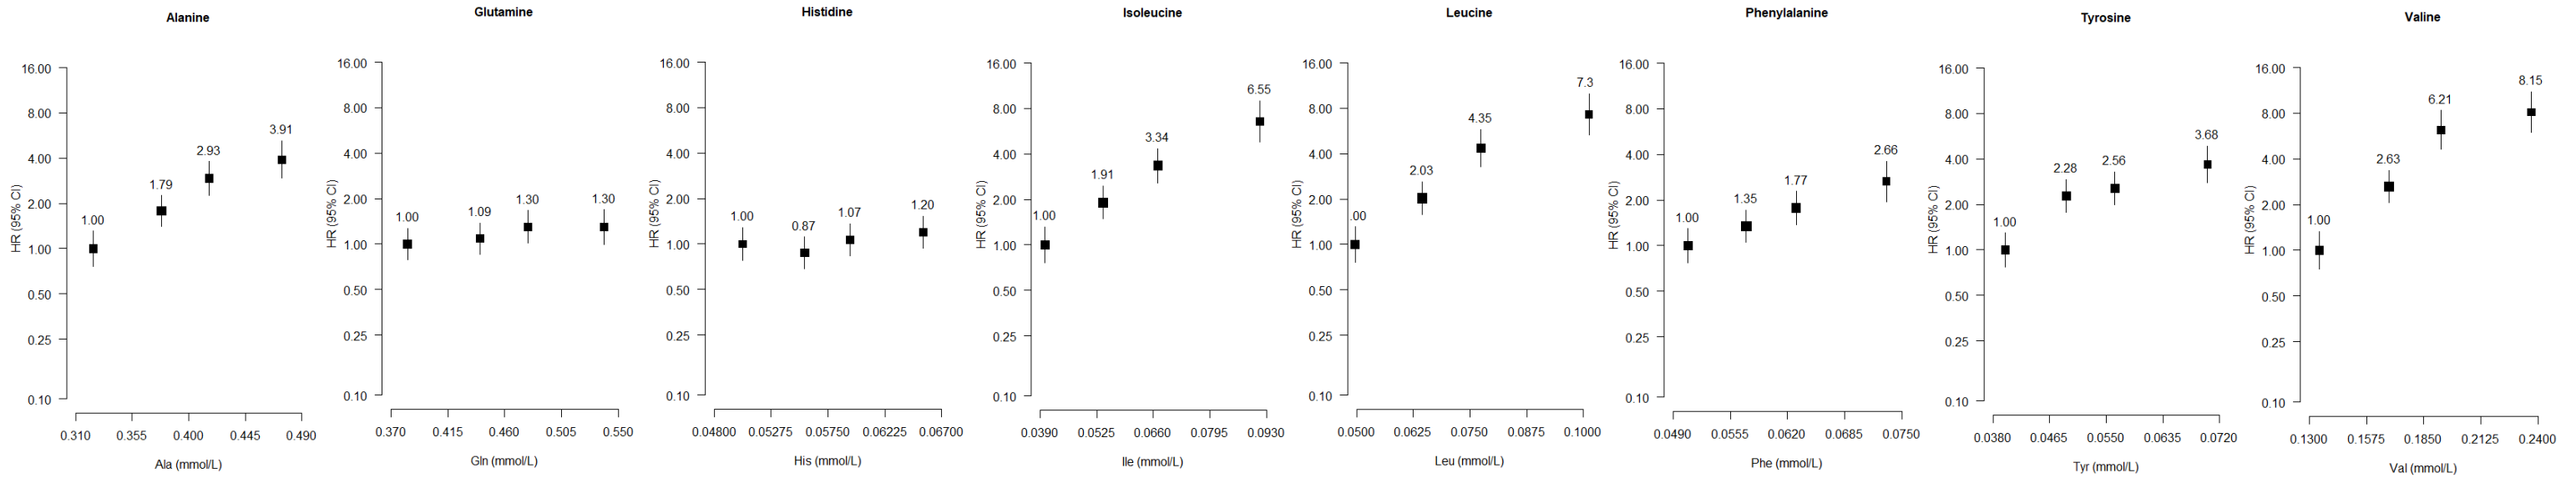

### E. Glycolysis metabolites

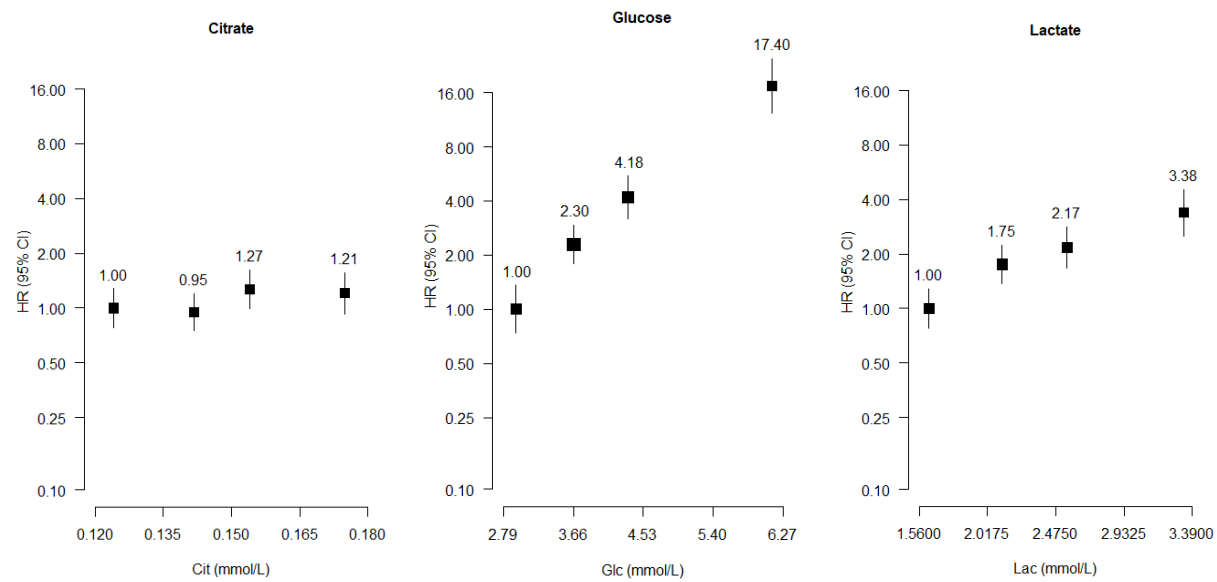

### F. Ketone bodies

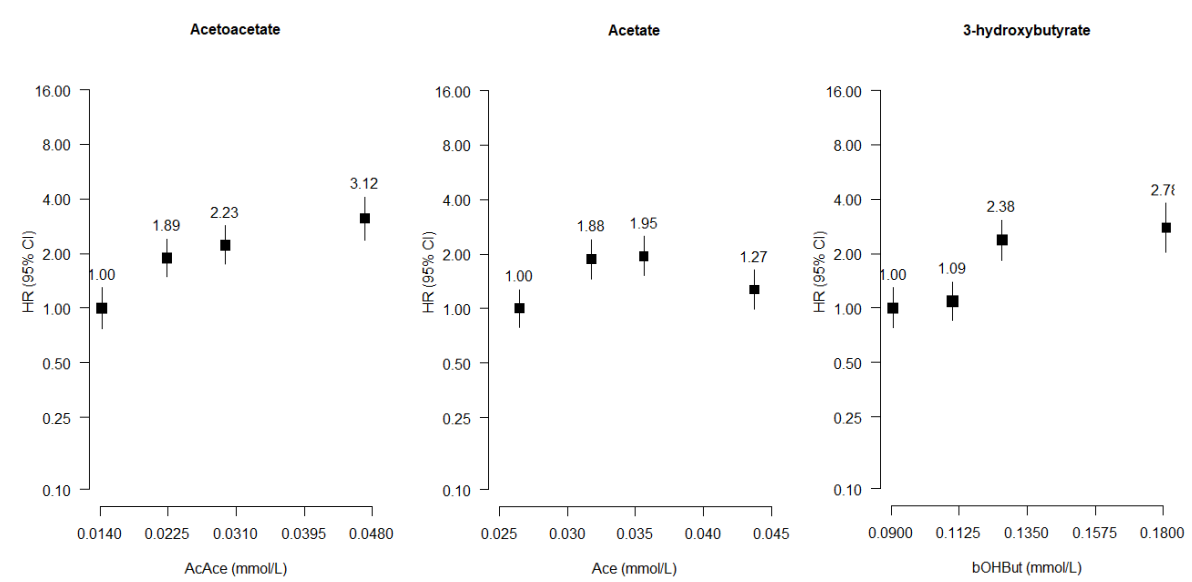

### F. Inflammation

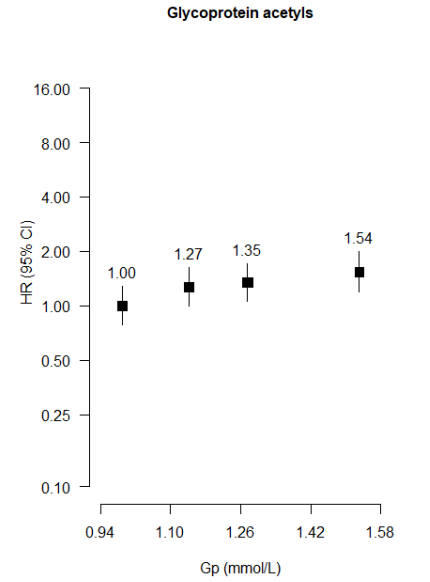

## Supplementary Figure S4. Associations of lipids, apolipoproteins and lipoprotein particle concentrations with risk of incident type 2 diabetes, stratified by adiposity

Adjusted for age, study area, education, fasting time, smoking, alcohol, physical activity, dietary factors and family history of diabetes

p-values for heterogeneity (comparing estimates across BMI or waist circumference strata) after adjustment for multiple testing using Benjamini-Hochberg correction: \*p≤0.05, \*\*p≤0.01, \*\*\*p≤0.001

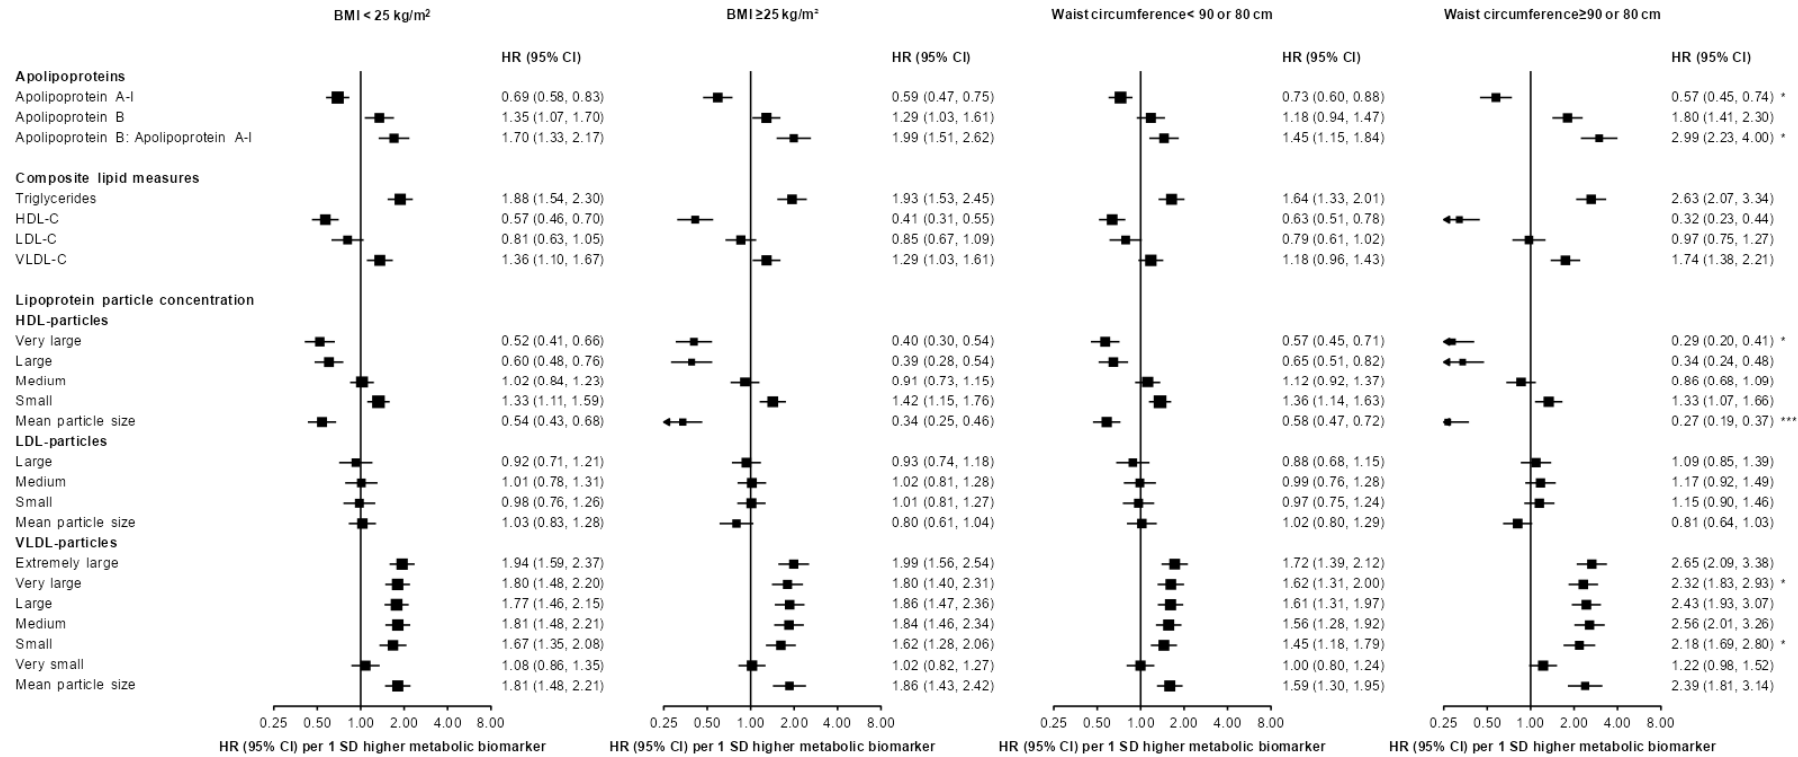

## Supplementary Figure S5. Associations of fatty acids, amino acids, glycolysis metabolites, ketone bodies and inflammatory markers with risk of incident type 2 diabetes, stratified by adiposity

Adjusted for age, study area, education

p-values for heterogeneity (comparing estimates across BMI or waist circumference strata) after adjustment for multiple testing using Benjamini-Hochberg correction: \*p≤0.05, \*\*p≤0.01, \*\*\*p≤0.001

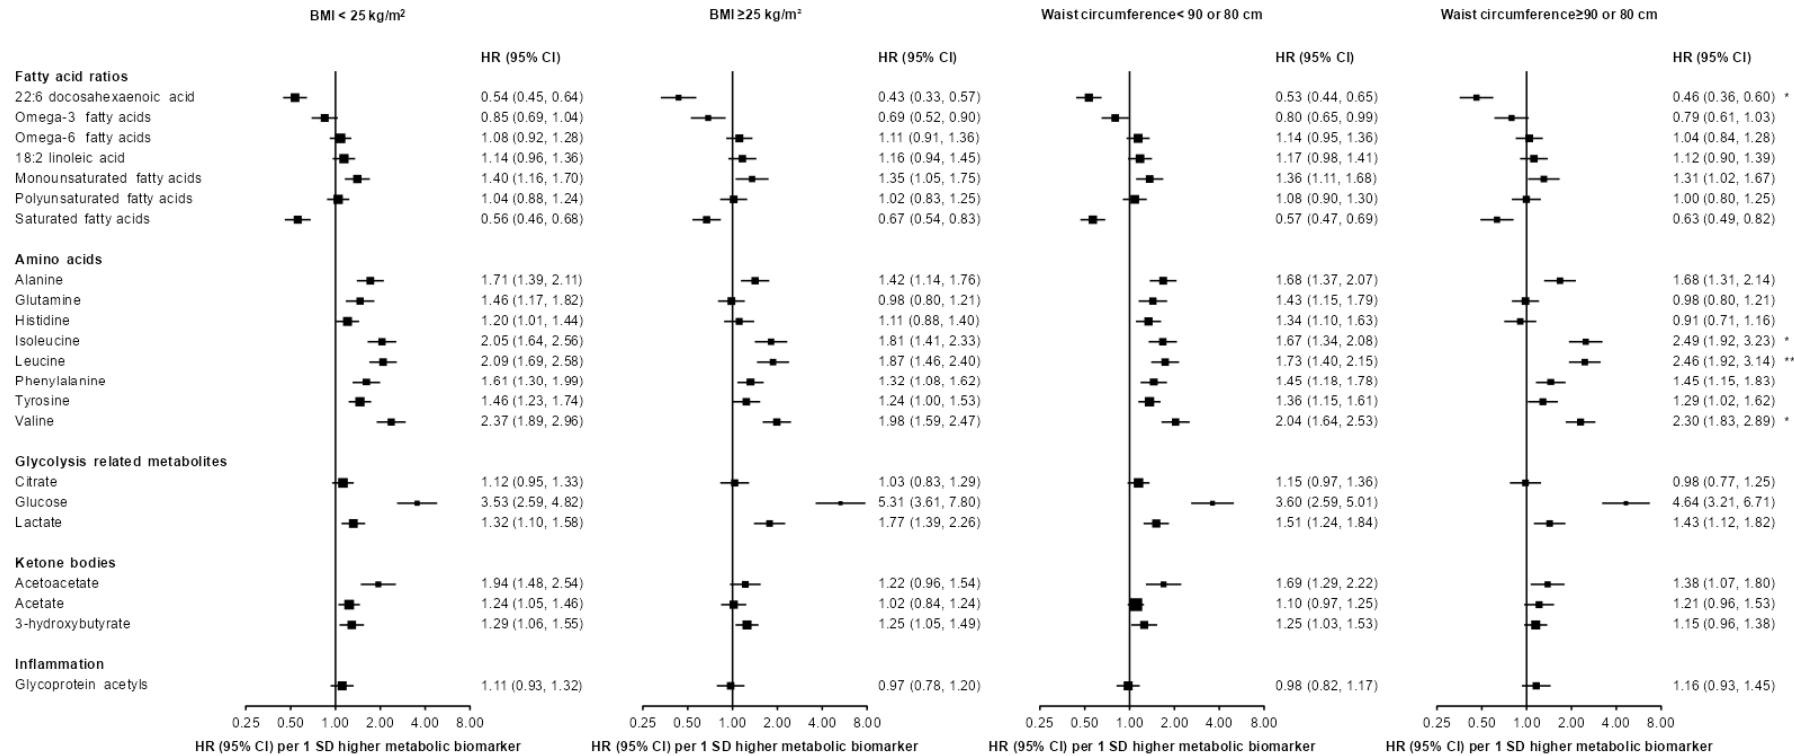

## Supplementary Figure S6. Associations of lipids, apolipoproteins and lipoprotein particle concentrations with risk of incident type 2 diabetes, stratified by age

Adjusted for age, study area, education, fasting time, smoking, alcohol, physical activity, dietary factors, family history of diabetes, BMI and waist circumference

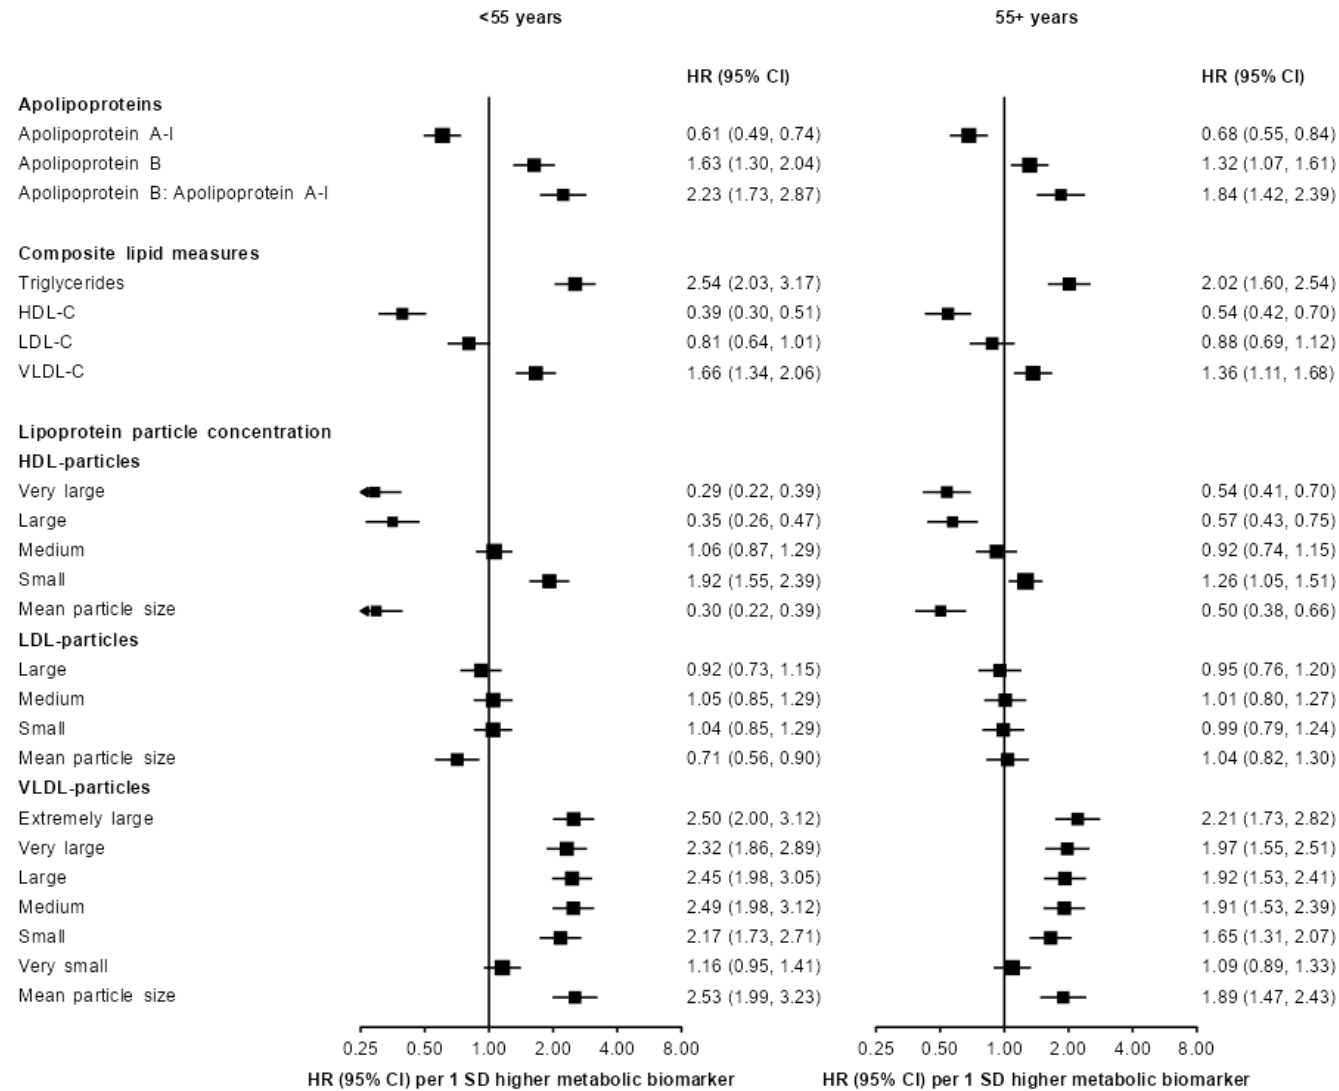



**Supplementary Figure S7. Associations of fatty acids, amino acids, glycolysis metabolites, ketone bodies and inflammatory markers with risk of incident type 2 diabetes, stratified by age**

Adjusted for age, study area, education, fasting time, smoking, alcohol, physical activity, dietary factors, family history of diabetes, BMI and waist circumference

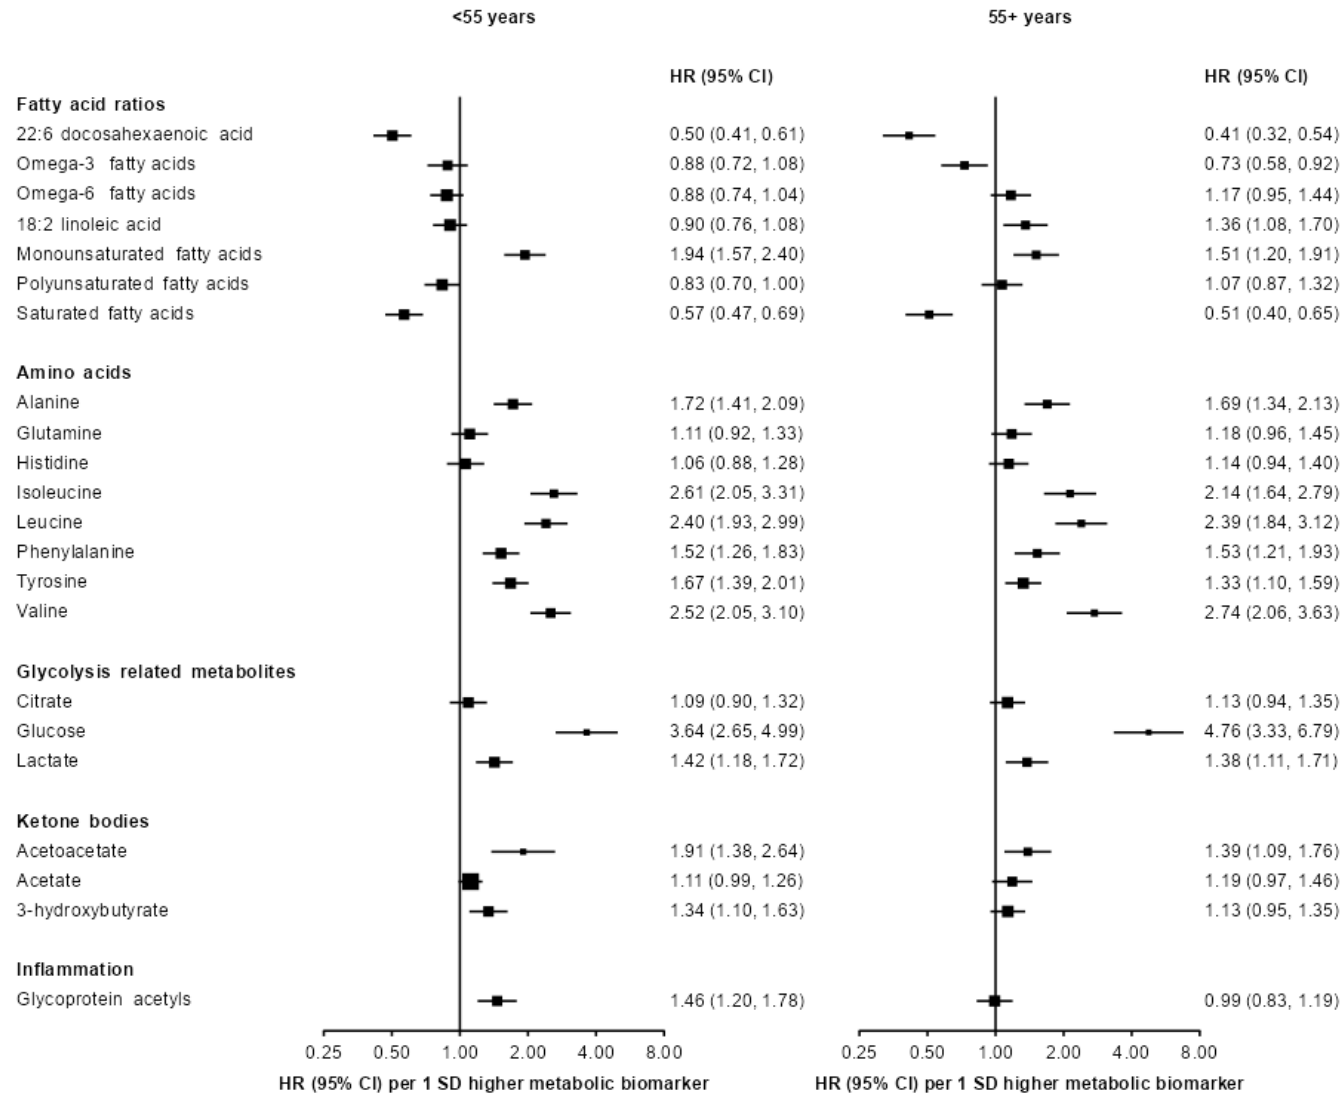

## Supplementary Figure S8. Associations of lipids, apolipoproteins and lipoprotein particle concentrations with risk of incident type 2 diabetes, stratified by sex

Adjusted for age, study area, education, fasting time, smoking, alcohol, physical activity, dietary factors, family history of diabetes, BMI and waist circumference

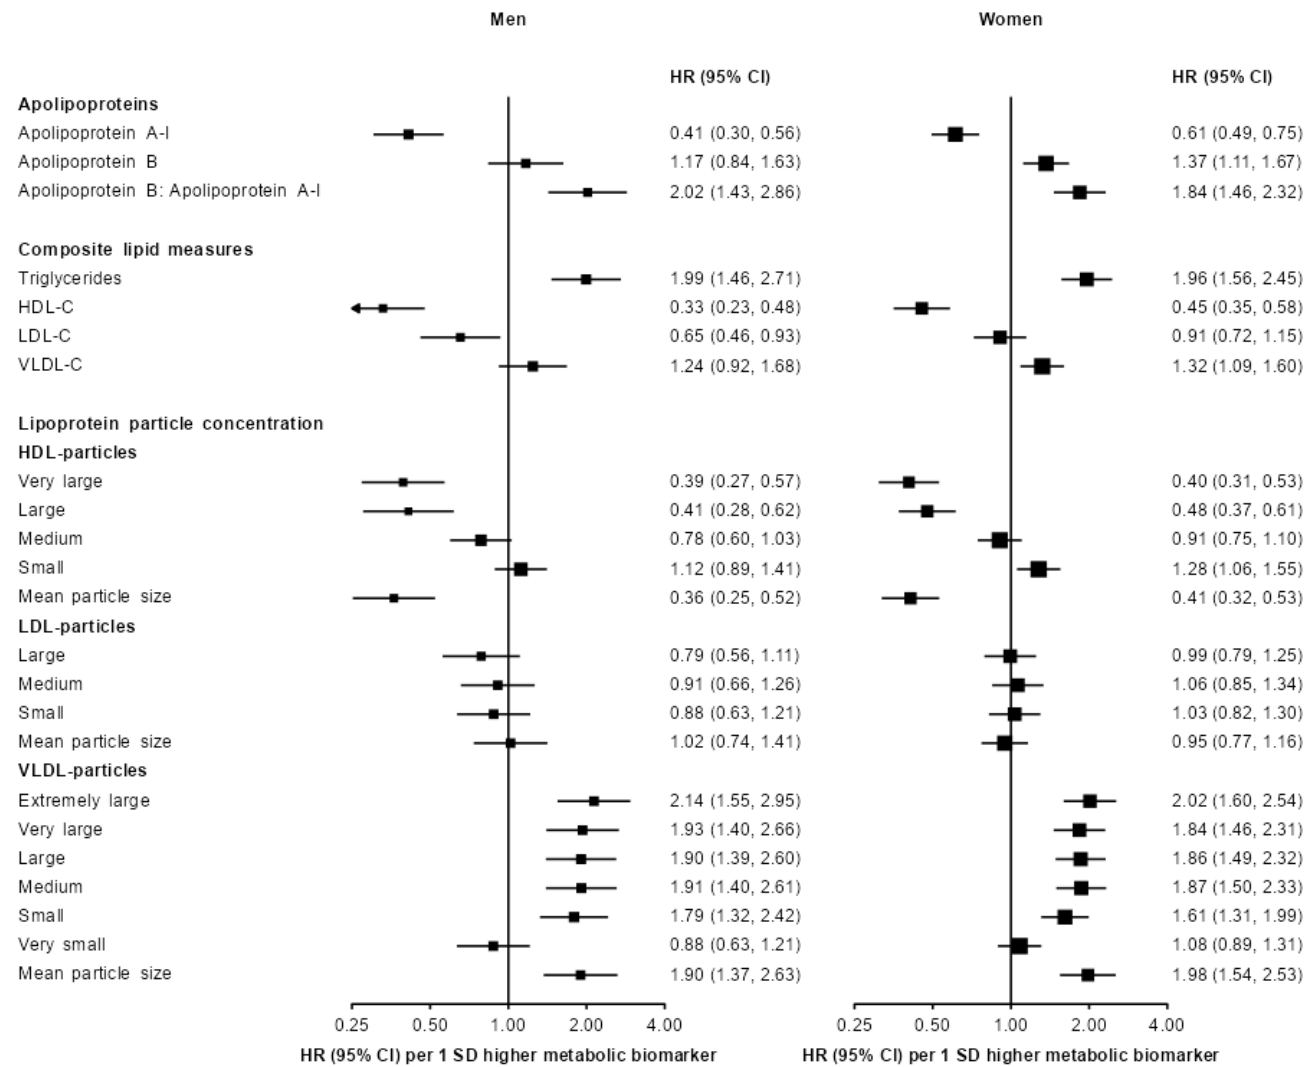

**Supplementary Figure S9. Associations of fatty acids, amino acids, glycolysis metabolites, ketone bodies and inflammatory markers with risk of incident type 2 diabetes, stratified by sex**

Adjusted for age, study area, education, fasting time, smoking, alcohol, physical activity, dietary factors, family history of diabetes, BMI and waist circumference

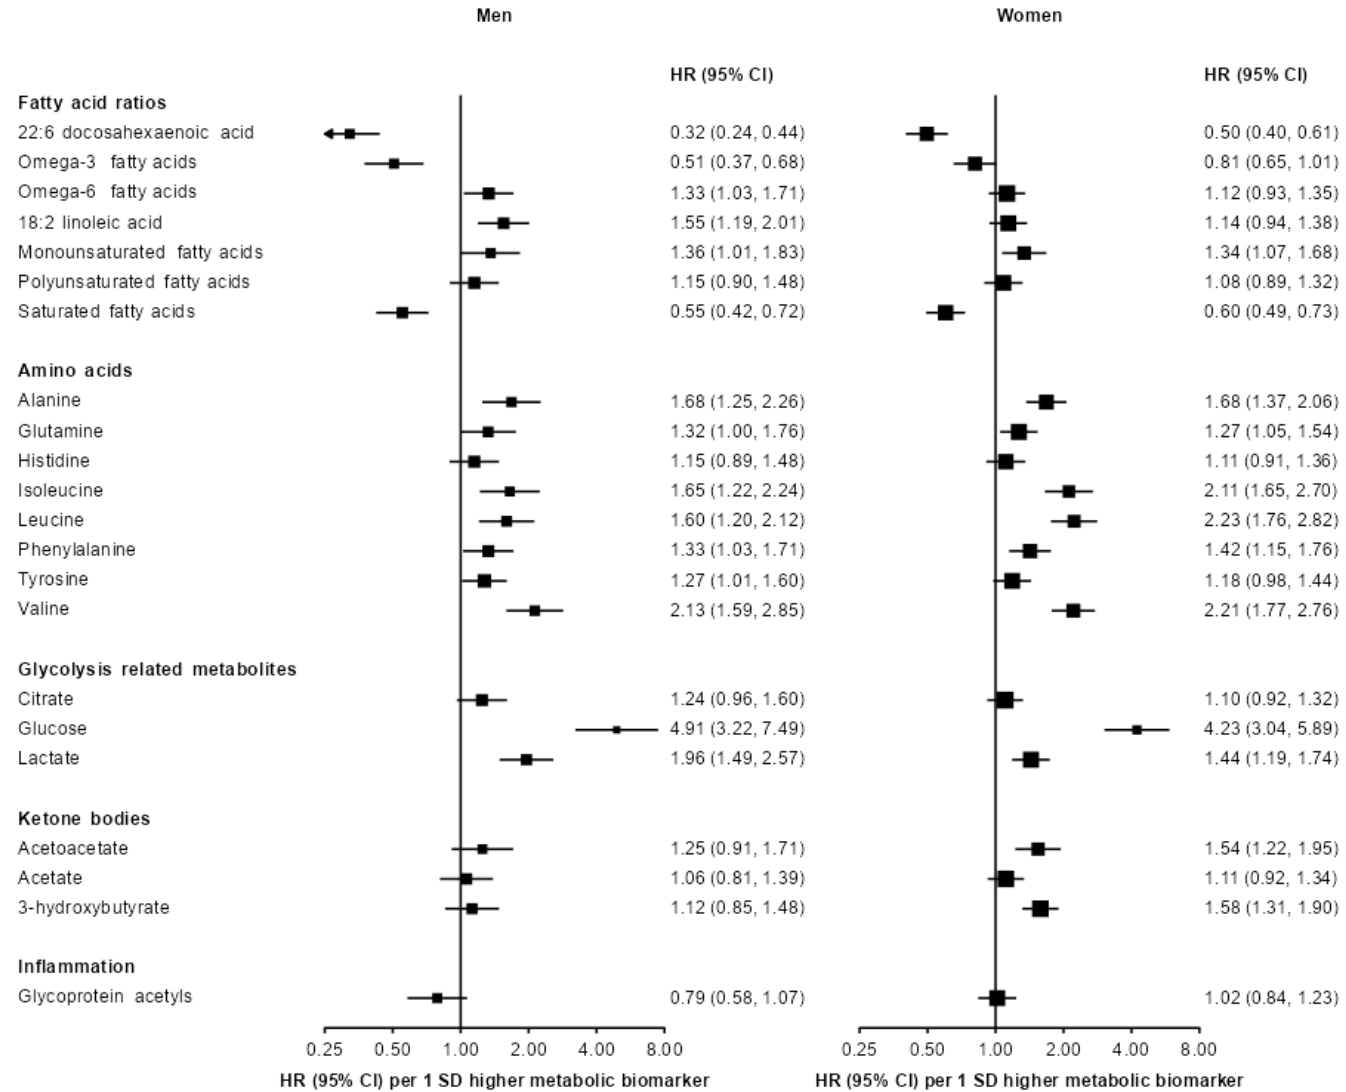

## Supplementary Figure S10. Associations of lipids, apolipoproteins and lipoprotein particle concentrations with risk of incident type 2 diabetes, stratified by region

Adjusted for age, study area, education, fasting time, smoking, alcohol, physical activity, dietary factors, family history of diabetes, BMI and waist circumference

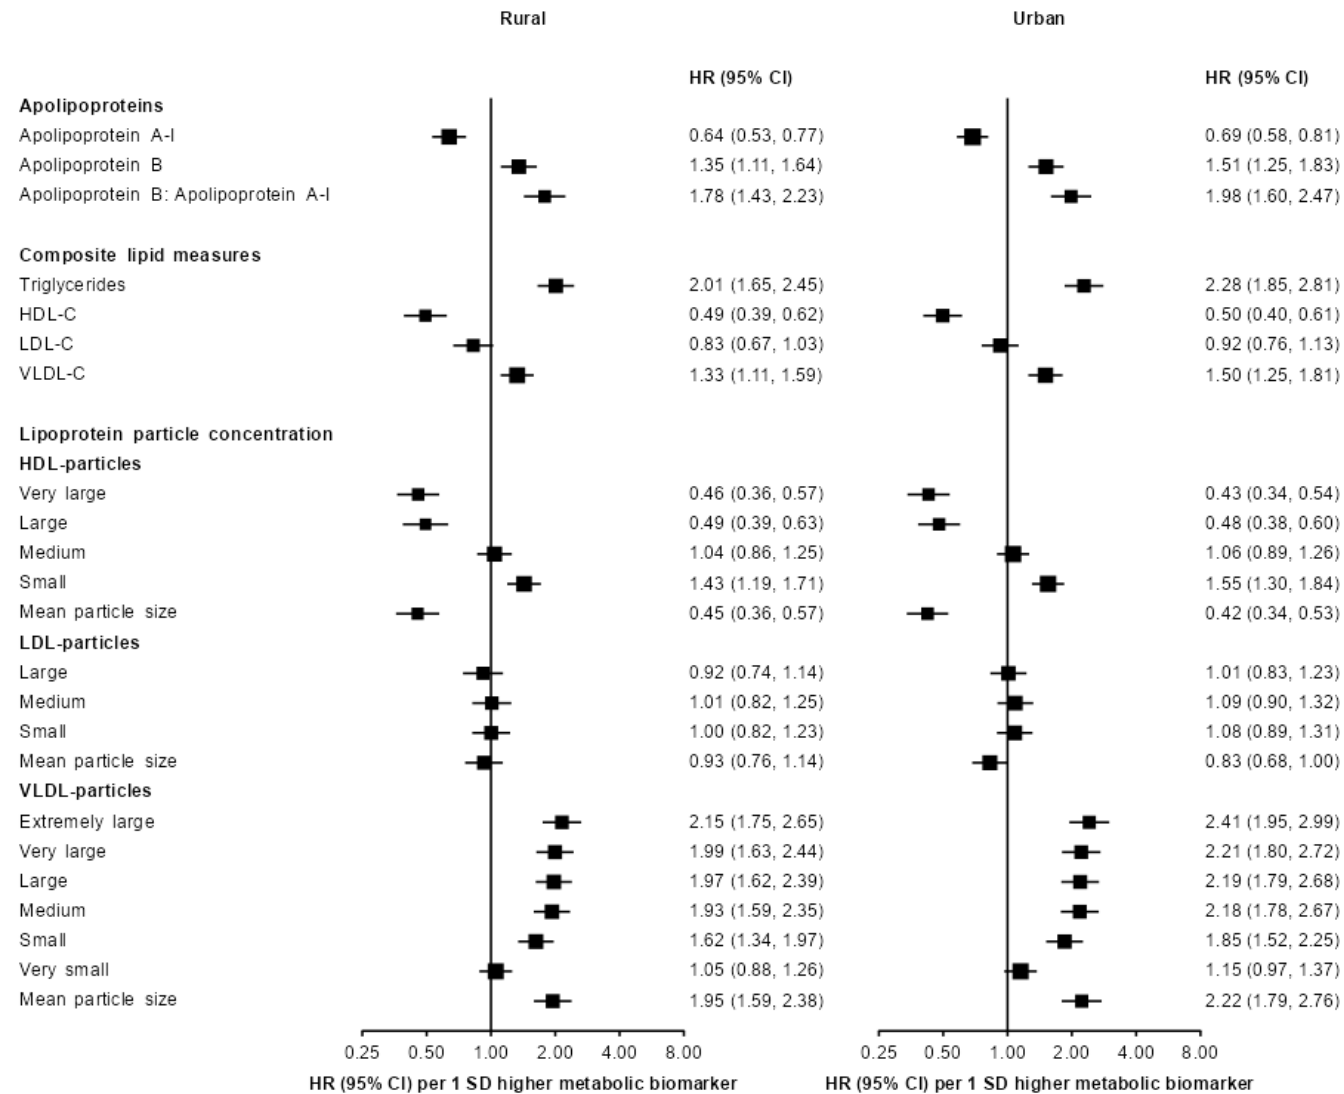

**Supplementary Figure S11. Associations of fatty acids, amino acids, glycolysis metabolites, ketone bodies and inflammatory markers with risk of incident type 2 diabetes, stratified by region**

Adjusted for age, study area, education, fasting time, smoking, alcohol, physical activity, dietary factors, family history of diabetes, BMI and waist circumference, fasting time, smoking, alcohol, physical activity, dietary factors and family history of diabetes

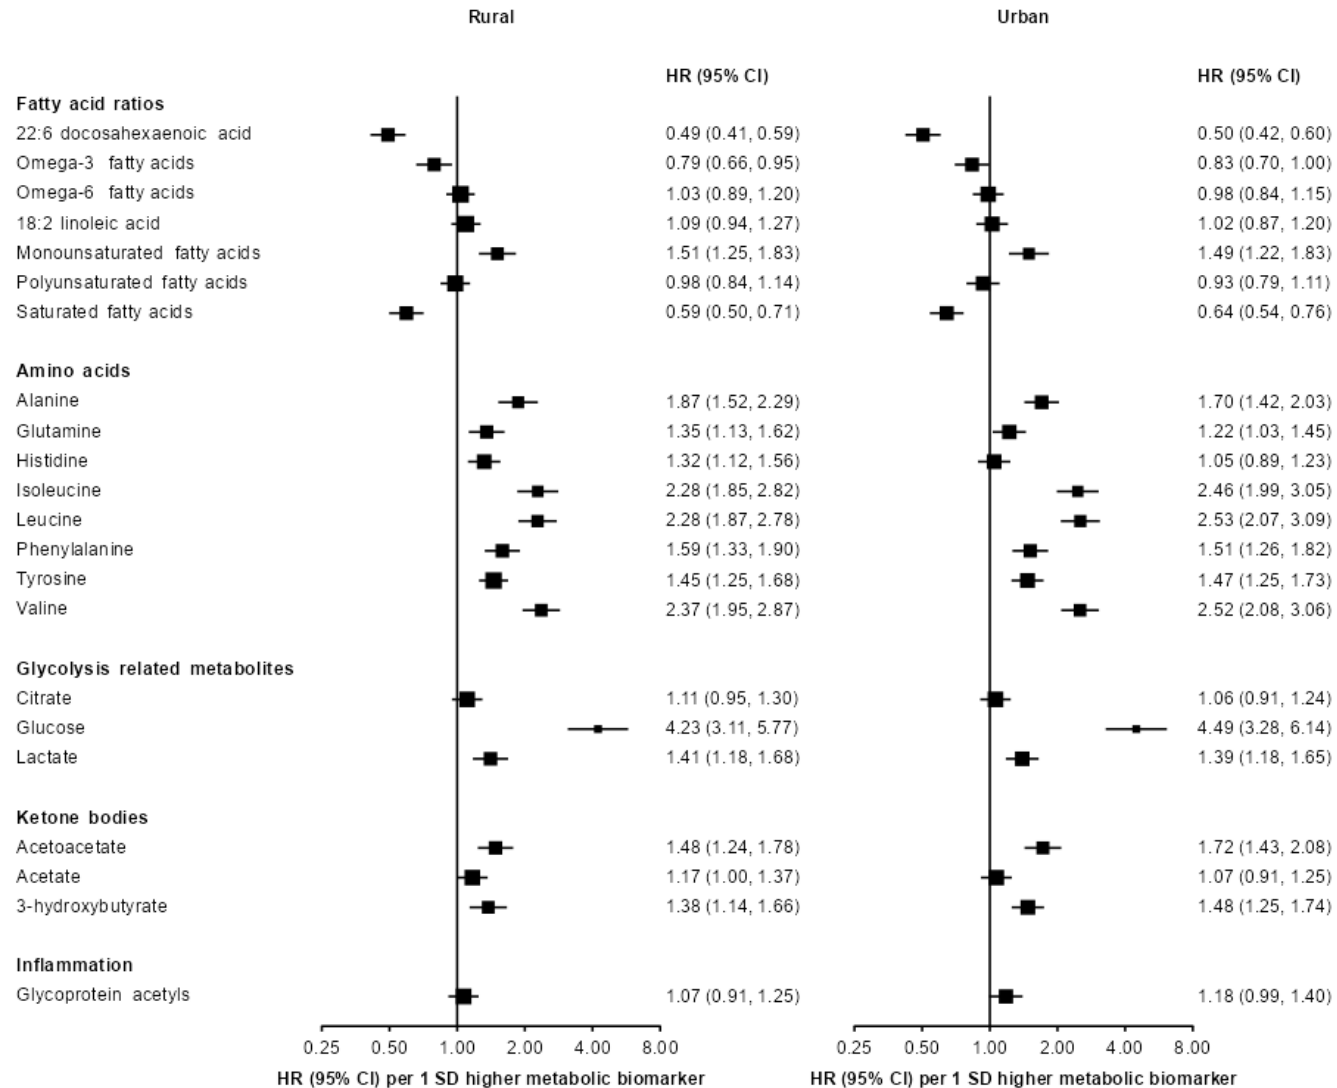

## Supplementary Figure S12. Associations of metabolic biomarkers with risk of incident type 2 diabetes (n=757) excluding the first 2 years of follow-up

Adjusted for age, sex, study area, education, fasting time, smoking, alcohol, physical activity, dietary factors, family history of diabetes, BMI and waist circumference. Squares represent the HR. Horizontal lines represent the corresponding 95% CI. Fatty acid ratios represent ratios of individual to total fatty acids  
\*p<0.05, \*\*p<0.01, \*\*\*p<0.001 after adjustment for multiple testing using Benjamini-Hochberg correction

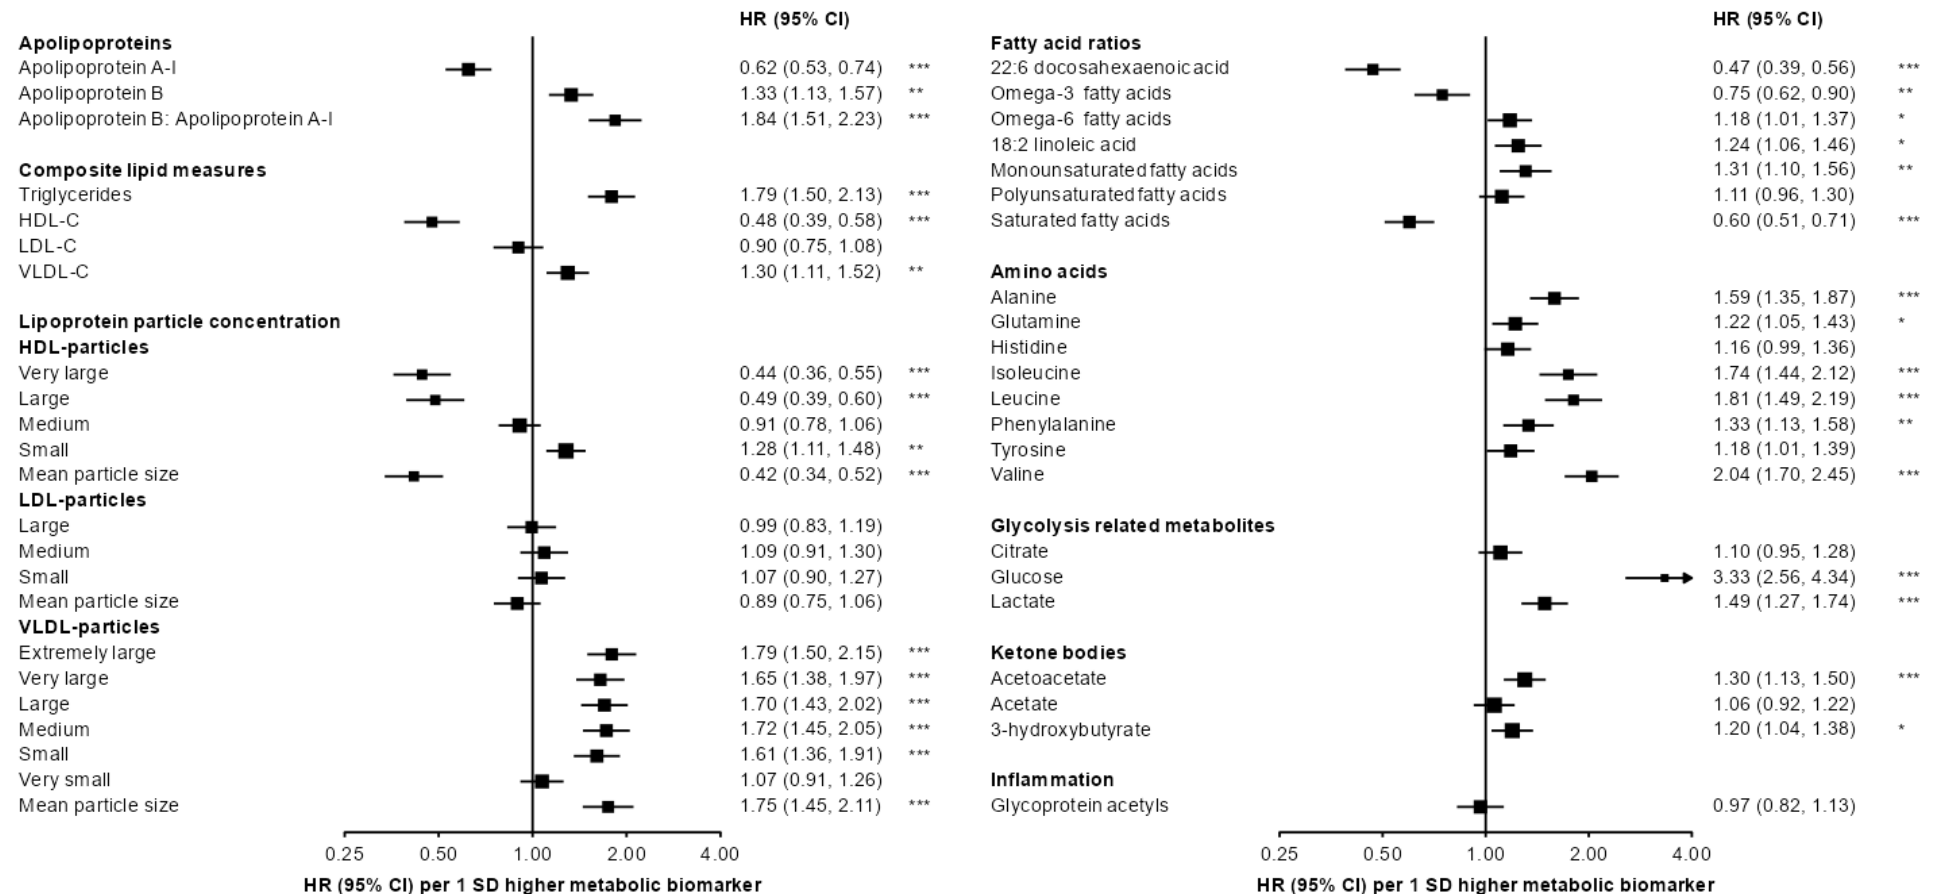

Supplement: 41598_2022_19159_MOESM1_ESM.pdf [file 41598_2022_19159_MOESM1_ESM.pdf]
